# Supplementary material for: Comparative demography of commercially-harvested snappers and an emperor from American Samoa
Source: PeerJ. 2018 Jun 18;6:e5069. doi: 10.7717/peerj.5069 (PMC6011874; doi:10.7717/peerj.5069)
Supplement: Supplemental Information 2 [file peerj-06-5069-s002.xlsx]

## Sheet: Lethrinus xanthochilus
Fish_ID	Month	Genus	Species	Length_cm	Weight_g	SexMacro	SexHisto	Maturity	GonWeight_g	Oto_Wt_g	Age1_yr	Age2_yr	Age3_yr	ConcensusAge
AAP-2280	12	Lethrinus	xanthochilus	39.2	898	Male			0.704
AASJ-93	2	Lethrinus	xanthochilus	30	407	Female	M		0.572	0.072	4	3	4	4
AASJ-95	2	Lethrinus	xanthochilus	25.1	293	Female	F	MAT	1.429	0.059	3	6	3	3
AASJ-96	2	Lethrinus	xanthochilus	21.1	175	Female	M		0.104	0.0442	2	2		2
AATT 1000	3	Lethrinus	xanthochilus	33	598	Female			4.26	0.0748	2	2		2
AATT 1001	3	Lethrinus	xanthochilus	43.8	1301	Female			12.818	0.1534	8	9	8	8
AATT 1051	4	Lethrinus	xanthochilus	35.7	758	Female			2.322	0.0715	4	4		4
AATT 1052	4	Lethrinus	xanthochilus	41.5	1217	Male			2.003	0.1311	7	6	7	7
AATT 1053	4	Lethrinus	xanthochilus	37	687	Female			3.117	0.0713	3	3		3
AATT 1054	4	Lethrinus	xanthochilus	42.2	1234	Female			0.756	0.1489	6	7	6	6
AATT 1055	4	Lethrinus	xanthochilus	38.2	979	Female			9.255	0.0833	3	3		3
AATT 1056	4	Lethrinus	xanthochilus	33.3	585	Female			2.687	0.0697	3	3		3
AATT 1057	4	Lethrinus	xanthochilus	35.2	701	Female			5.6	0.0736	3	3		3
AATT 992	3	Lethrinus	xanthochilus	33.5	618	Female			2.871	0.0762	3	3		3
AATT 993	3	Lethrinus	xanthochilus	39.6	1045	Female			1.208	0.1312	4	4		4
AATT 994	3	Lethrinus	xanthochilus	35.2	764	Female			5.021	0.0861	4	4		4
AATT 995	3	Lethrinus	xanthochilus	33.2	624	Female			3.613	0.0774	3	3		3
AATT 996	3	Lethrinus	xanthochilus	39.2	1015	Female			0.608	0.1179	6	6		6
AATT 997	3	Lethrinus	xanthochilus	42.8	1339	Female			0.827	0.1744	11	11		11
AATT 998	3	Lethrinus	xanthochilus	35.8	786	Female			4.421	0.0842	4	4		4
AATT 999	3	Lethrinus	xanthochilus	41.6	1204	Male			0.193	0.139	6	7	7	7
AATT1084	4	Lethrinus	xanthochilus	34.2	706	Female			5.194	0.0817	4	4		4
AATT1085	4	Lethrinus	xanthochilus	37.2	907	Female			7.752	0.0869	4	4		4
AATT1086	4	Lethrinus	xanthochilus	40.6	1100	Male			2.826	0.1223	6	6		6
AATT1087	4	Lethrinus	xanthochilus	42.1	1226	Female			8.457	0.1364	6	6		6
AATT1088	4	Lethrinus	xanthochilus	33.2	654	Female			6.257	0.0708	3	4	4	4
AATT1089	4	Lethrinus	xanthochilus	36.4	830	Female			1.803	0.0844	4	4		4
AATT1090	4	Lethrinus	xanthochilus	31.7	571	Female			3.593	0.0718	3	5	4	4
AATT1201	10	Lethrinus	xanthochilus	36	763	Female			1	0.0896	4	4		4
AATT1202	10	Lethrinus	xanthochilus	31.8	549	Female			19	0.0723	3	3		3
AATT1222	10	Lethrinus	xanthochilus	39.3	964				2.4	0.1771	13	13		13
AATT1262	10	Lethrinus	xanthochilus	35.6	806	Female			17.965	0.0865	3	4	4	4
AATT1263	10	Lethrinus	xanthochilus	38	859	Female			9.061	0.0932	4	5	5	5
AATT1265	10	Lethrinus	xanthochilus	34	756	Female			15.397	0.068	3	3		3
AATT1266	10	Lethrinus	xanthochilus	40.6	1059	Female			1.733	0.0937	3	3		3
AATT1267	10	Lethrinus	xanthochilus	38	910	Female			27.531	0.0945	4	4		4
AATT1268	10	Lethrinus	xanthochilus	35.7	745	Female			33.431	0.0823	3	3		3
AATT1269	10	Lethrinus	xanthochilus	36	791	Female			30.866	0.086	3	3		3
AATT1270	10	Lethrinus	xanthochilus	34.9	757	Female			31.514	0.0805	3	4	3	3
AATT1516	10	Lethrinus	xanthochilus	43.6	1492	Male			0.5	0.1507	6	7	7	7
AATT1517	10	Lethrinus	xanthochilus	41	1200	Male			11.6	0.1084	4	5	4	4
AATT1518	10	Lethrinus	xanthochilus	39.4	978	Female			14.4	0.1027	5	5		5
AATT1519	10	Lethrinus	xanthochilus	36.5	819	Female			3.5	0.0857	4	4		4
AATT1520	10	Lethrinus	xanthochilus	39	925	Female			6	0.1025	3	3		3
AATT1530	11	Lethrinus	xanthochilus	38.2	909	Male			2.3	0.0881	5	5		5
AATT1531	11	Lethrinus	xanthochilus	36.6	790	Female			28.7	0.083	4	4		4
AATT1532	11	Lethrinus	xanthochilus	42	1147	Male			3.2	0.1342	9	8	7	8
AATT1552	11	Lethrinus	xanthochilus	36	755	Female			2.7	0.0778	4	4		4
AATT1577	11	Lethrinus	xanthochilus	38.1	953	Male			0.055	0.09	4	4		4
AATT1578	11	Lethrinus	xanthochilus	39.8	987	Female			4.5	0.1025	4	5	6	5
AATT1579	11	Lethrinus	xanthochilus	37.2	802	Female			2.8	0.0877	4	4		4
AATT1619	12	Lethrinus	xanthochilus	33	579	Female			3.322	0.0745	3	3		3
AATT1620	12	Lethrinus	xanthochilus	36.7	649	Male			0.681	0.144	12	12		12
AATT1677	1	Lethrinus	xanthochilus	41.4	992	Male			1.267	0.1985
AATT1678	1	Lethrinus	xanthochilus	33.4	593	Female			2.06	0.0842
AATT1679	1	Lethrinus	xanthochilus	40.7	1037	Male			0.547	0.1982	13	14	14	14
AATT-203	10	Lethrinus	xanthochilus	33	550	Female			2.081
AATT-204	10	Lethrinus	xanthochilus	34	635	Female	F	IMM	3.398	0.0703	3	3		3
AATT-205	10	Lethrinus	xanthochilus	37.2	899	Male	M		3.545	0.0886	3	3		3
AATT-206	10	Lethrinus	xanthochilus	36	645	Female	F	MAT	8.748	0.0846	3	3		3
AATT-2281	2	Lethrinus	xanthochilus	51.7	2373	Male			8.204
AATT-2381	2	Lethrinus	xanthochilus	36.6	866	Female			9.276
AATT-2382	2	Lethrinus	xanthochilus	45	1617	Male			12.337
AATT-2383	2	Lethrinus	xanthochilus	36.5	834	Female			7.395
AATT-2384	2	Lethrinus	xanthochilus	37.5	935	Male			7.095
AATT-2385	2	Lethrinus	xanthochilus	43.4	1495	Female			5.98
AATT-2386	2	Lethrinus	xanthochilus	38.5	1030	Female			9.451
AATT-241	11	Lethrinus	xanthochilus	38	1005	Male	M		2.468	0.1041	5	5		5
AATT-2411	3	Lethrinus	xanthochilus	43	1474	Male			2.579
AATT-2412	3	Lethrinus	xanthochilus	39.5	1003	Male			13.079
AATT-2413	3	Lethrinus	xanthochilus	47.5	1486	Female			4.853
AATT-2414	3	Lethrinus	xanthochilus	39.1	1069	Male			5.069
AATT-2415	3	Lethrinus	xanthochilus	40.1	1078	Male			1.872
AATT-2416	3	Lethrinus	xanthochilus	39.5	1026	Male			3.902
AATT-242	11	Lethrinus	xanthochilus	38.2	1010	Male	M		10.557	0.1144	6	6		6
AATT-243	11	Lethrinus	xanthochilus	38.4	1000	Male	M		3.137	0.1273	6	6		6
AATT-2447	3	Lethrinus	xanthochilus	31.1	580	Female			1.578
AATT-2448	3	Lethrinus	xanthochilus	35.6	732	Female			3.628
AATT-2449	3	Lethrinus	xanthochilus	40.5	1089	Female			0.545
AATT-2450	3	Lethrinus	xanthochilus	43.7	1402	Female			3.602
AATT-2481	3	Lethrinus	xanthochilus	42.2	1462	Female			40.785
AATT-2482	3	Lethrinus	xanthochilus	45.2	1643	Female			26.984
AATT-2483	3	Lethrinus	xanthochilus	36	784	Female			5.673
AATT-2484	3	Lethrinus	xanthochilus	37	900	Female			9.419
AATT-2485	3	Lethrinus	xanthochilus	39.2	1042	Female			5.549
AATT-2486	3	Lethrinus	xanthochilus	36.8	852	Female			6.325
AATT-2487	3	Lethrinus	xanthochilus	40.6	1147	Female			8.148
AATT-2488	3	Lethrinus	xanthochilus	39.4	770	Male			10.801
AATT-331	12	Lethrinus	xanthochilus	36.5	757	Female	F	MAT	6.063
AATT-332	12	Lethrinus	xanthochilus	41.3	1109	Male	M		3.918
AATT-451	1	Lethrinus	xanthochilus	40.5	1109	Male	M		9.162	0.1183	5	4	5	5
AATT-452	1	Lethrinus	xanthochilus	40.3	1139	Male	M		2.462	0.1044	5	5		5
AATT-453	1	Lethrinus	xanthochilus	34.5	673	Female	F	IMM	3.392	0.0636	2	2		2
AATT-454	1	Lethrinus	xanthochilus	38.5	929	Female	F	IMM	2.897	0.0795	3	3		3
AATT-455	1	Lethrinus	xanthochilus	40	1186	Female	F	MAT	19.036	0.1188	6	6		6
AATT-456	1	Lethrinus	xanthochilus	37.2	914	Female	F	MAT	6.381	0.1003	4	4		4
AATT-457	1	Lethrinus	xanthochilus	40.7	1173	Male	M		3.783	0.1203	5	5		5
AATT523	3	Lethrinus	xanthochilus	36.4	777	Male	M		0.597	0.0738	3	3		3
AATT524	3	Lethrinus	xanthochilus	42.1	1250	Male			0.389	0.1073	5	5		5
AATT525	3	Lethrinus	xanthochilus	38	898	Male	M		2.012	0.1032	4	5	5	5
AATT526	3	Lethrinus	xanthochilus	33	608	Female	F	MAT	6.498	0.0732	2	2		2
AATT527	3	Lethrinus	xanthochilus	38.2	919	Male	M		0.904	0.104	6	6		6
AATT622	5	Lethrinus	xanthochilus	39.9	761	Female	M		3.21	0.0815	4	4		4
AATT623	5	Lethrinus	xanthochilus	36	753	Female	F	MAT	8.275	0.0715	3	4	4	4
AATT624	5	Lethrinus	xanthochilus	32.1	565	Female	F	MAT	4.63	0.0592	2	2		2
AATT625	5	Lethrinus	xanthochilus	36.7	792	Female	F	MAT	6.267	0.101	5	4	5	5
AATT626	5	Lethrinus	xanthochilus	37.3	813	Female	F	MAT	4.887	0.0832	5	5		5
AATT627	5	Lethrinus	xanthochilus	38	947	Female	F	MAT	14.361	0.1025	5	5		5
AATT643	5	Lethrinus	xanthochilus	38.1	909	Male			1.868	0.1099	7	6	7	7
AATT644	5	Lethrinus	xanthochilus	35.2	700	Female	F	MAT	4.604	0.0748	2	2		2
AATT645	5	Lethrinus	xanthochilus	32.9	567	Female	F	MAT	3.893	0.0645	2	2		2
AATT702	12	Lethrinus	xanthochilus	42	1234	Female	F	MAT	29.02	0.1707	10	10		10
AATT704	12	Lethrinus	xanthochilus	34.2	644	Female	F	MAT	21.756	0.0665	3	3		3
AATT706	12	Lethrinus	xanthochilus	39.7	1082	Male	M		0.73	0.1258	7	6	7	7
AATT711	12	Lethrinus	xanthochilus	40	1091	Male	F	MAT	0.334
AATT714	12	Lethrinus	xanthochilus	45	999	Female	F	MAT	6.233	0.1678	11	11		11
AATT750	12	Lethrinus	xanthochilus	41.5	1184	Male	M		1.316	0.1663	11	11		11
AATT752	12	Lethrinus	xanthochilus	40	908	Male	M		1.201	0.174	11	11		11
AATT753	12	Lethrinus	xanthochilus	40.7	1036	Male	F	MAT	0.261	0.1854	12	12		12
AATT754	12	Lethrinus	xanthochilus	33.3	598	Female	F	IMM	1.856	0.0696	3	3		3
AATT760	12	Lethrinus	xanthochilus	34.5	645	Female	F	MAT	2.966	0.082	3	3		3
AATT761	12	Lethrinus	xanthochilus	36	759	Female	F	MAT	2.937	0.0687	4	3	4	4
AATT762	12	Lethrinus	xanthochilus	39.1	923	Male	M		0.426	0.1286	7	8	7	7
AATT763	12	Lethrinus	xanthochilus	38.8	953	Male	M		0.464	0.1014	5	5		5
AATT764	12	Lethrinus	xanthochilus	35	634	Male	F	IMM	1.514	0.0738	3	4	4	4
AATT765	12	Lethrinus	xanthochilus	36.2	751	Female	F	IMM	3.572	0.0783	5	5		5
AATT766	12	Lethrinus	xanthochilus	39.8	1037	Male	M		0.858	0.1335	6	6		6
AATT843	1	Lethrinus	xanthochilus	37.3	790	Female	F	MAT	8.127	0.0888	4	4		4
AATT844	1	Lethrinus	xanthochilus	39	925	Male	M		0.178	0.1363	11	11		11
AATT856	1	Lethrinus	xanthochilus	40	1053	Male	M		176	0.121	6	5	6	6
AATT857	1	Lethrinus	xanthochilus	42.5	1143	Male	M		3	0.1908	11	12	11	11
AATT858	1	Lethrinus	xanthochilus	35.1	655	Male	M		1.28	0.0796	5	5		5
AATT859	1	Lethrinus	xanthochilus	37	751	Male	M		1	0.0952	5	5		5
AATT860	1	Lethrinus	xanthochilus	34.3	632	Male	M		1.59	0.0827	4	4		4
AATT861	1	Lethrinus	xanthochilus	42	1058	Male	M		2.114	0.2038	18	19	20	19
AATT907	2	Lethrinus	xanthochilus	40.5	1029	Male	M		0.577	0.1272	7	8	7	7
AATT908	2	Lethrinus	xanthochilus	41.9	1111	Male	M		0.678	0.1957	15	15		15
AATT909	2	Lethrinus	xanthochilus	39	874	Male	M		1.266	0.1215	8	8		8
AATT910	2	Lethrinus	xanthochilus	33.8	610	Female	F	MAT	2.407	0.0797	5	5		5
AATT911	2	Lethrinus	xanthochilus	39.5	907	Male	M		1.162	0.1182	8	7	8	8
AATT912	2	Lethrinus	xanthochilus	33.3	575	Female	F	MAT	2.966	0.0752	3	4	3	3
AATT913	2	Lethrinus	xanthochilus	34.5	597	Female	F	IMM	2.263	0.0741	2	4	3	3
AATT914	2	Lethrinus	xanthochilus	39.6	1030	Male			0.574	0.158	11	10	9	10
AATT915	2	Lethrinus	xanthochilus	33.6	605	Female	F	IMM	3.155	0.072	3	3		3
AATT916	2	Lethrinus	xanthochilus	38	872	Male	M		0.444	0.1028	5	5		5
APT-472	11	Lethrinus	xanthochilus	32.7	578	Female			8.781
AS + F-2703	5	Lethrinus	xanthochilus	45.8	1766	Female			40.139
ASNTJ-2494	3	Lethrinus	xanthochilus	42.5	1378	Female			28.21
ASNTJ-2515	3	Lethrinus	xanthochilus	45.6	1679	Male			5.894
ASNTJ-2516	3	Lethrinus	xanthochilus	40.4	1183	Female			9.515
ASNTJ-2517	3	Lethrinus	xanthochilus	39.1	988	Male			2.971
ASNTJ-2518	3	Lethrinus	xanthochilus	37.5	877	Male			3.744
ASNTJ-2519	3	Lethrinus	xanthochilus	35.8	735	Female			11.075
ASNTJ-2520	3	Lethrinus	xanthochilus	38.9	1029	Female			8.182
ASNTJ-2521	3	Lethrinus	xanthochilus	42.5	1370	Male			6.545
ASNTJ-2628	4	Lethrinus	xanthochilus	42	1165	Male			0.665
ASNTJ-2631	4	Lethrinus	xanthochilus	38	950	Female			8
ASPT 522	12	Lethrinus	xanthochilus	34.4	658	Female			5.085	0.0724	3	3		3
ASPT 1671	3	Lethrinus	xanthochilus	34.7	672	Female			3.972	0.0791	3	4	3	3
ASPT 1672	3	Lethrinus	xanthochilus	40.5	1081	Female			3.054	0.1159	7	7		7
ASPT 1673	3	Lethrinus	xanthochilus	34.1	684	Female			1.345	0.0722	3	4	4	4
ASPT 1674	3	Lethrinus	xanthochilus	32.5	603	Female			4.15	0.0716	3	3		3
ASPT 1675	3	Lethrinus	xanthochilus	40.4	1064	Male			1.257	0.1163	4	5	5	5
ASPT 1676	3	Lethrinus	xanthochilus	37.2	833	Female			3.799	0.0965	4	4		4
ASPT 1677	3	Lethrinus	xanthochilus	40	1079	Female			2.203	0.1038	4	4		4
ASPT 1678	3	Lethrinus	xanthochilus	34.5	673	Female			2.833	0.0762	4	4		4
ASPT 1679	3	Lethrinus	xanthochilus	31.7	555	Male			0.668	0.068	3	3		3
ASPT 521	12	Lethrinus	xanthochilus	34.1	648	Female	F	MAT	3.922	0.0686	2	3	3	3
ASPT 523	12	Lethrinus	xanthochilus	31.9	550	Female	F	MAT	4.068	0.0641	3	3		3
ASPT 524	12	Lethrinus	xanthochilus	32.5	560	Female	F	MAT	5.651	0.0653	2	2		2
ASPT 525	12	Lethrinus	xanthochilus	34.6	686	Female	F	MAT	5.728	0.0839	3	3		3
ASPT-1015	7	Lethrinus	xanthochilus	40.9	1159	Female	F	MAT	30.305	0.1651	11	12	12	12
ASPT-1016	7	Lethrinus	xanthochilus	35.2	718	Female	M		1.842	0.075	3	3		3
ASPT-1017	7	Lethrinus	xanthochilus	39.2	974	Male	M		13.669	0.113	6	6		6
ASPT-1018	7	Lethrinus	xanthochilus	37.2	834	Male	F	MAT	25.458	0.087	4	4		4
ASPT-1019	7	Lethrinus	xanthochilus	39.6	1029	Male	M		5.979	0.1133	5	6	6	6
ASPT1084	8	Lethrinus	xanthochilus	23.9	240	Female	F	IMM	0.105	0.0441	2	2		2
ASPT1095	8	Lethrinus	xanthochilus	40.1	1046	Male	M		2.095	0.1202	6	6		6
ASPT1097	8	Lethrinus	xanthochilus	40.1	1048	Female	M		3.836	0.1121	5	5		5
ASPT1098	8	Lethrinus	xanthochilus	35.4	717	Female	F	IMM	4.719	0.0778	3	3		3
ASPT1099	8	Lethrinus	xanthochilus	36.3	750	Female	F	MAT	9.35	0.0909	3	5	5	5
ASPT1139	8	Lethrinus	xanthochilus	31.7	505	Female	F	MAT	6.729	0.0647	2	3	2	2
ASPT1140	8	Lethrinus	xanthochilus	31.1	499	Female	F	MAT	3.607	0.0666	2	3	3	3
ASPT1287	11	Lethrinus	xanthochilus	19.7	151	Male			0.054	0.0222	1	2	1	1
ASPT1288	11	Lethrinus	xanthochilus	19.5	135	Male	M		0.102	0.0225	2	1	1	1
ASPT1363	11	Lethrinus	xanthochilus	33.2	619	Female			2.043
ASPT1364	11	Lethrinus	xanthochilus	38	876	Female			7.502
ASPT1365	11	Lethrinus	xanthochilus	35.7	831	Female			110
ASPT1366	11	Lethrinus	xanthochilus	39.9	1074	Female			3.338
ASPT1367	11	Lethrinus	xanthochilus	36.9	877	Female			3.13
ASPT1368	11	Lethrinus	xanthochilus	38.1	961	Female			5.141
ASPT1369	11	Lethrinus	xanthochilus	38.1	913	Female			1.52
ASPT1370	11	Lethrinus	xanthochilus	41.6	1189	Female			11.803
ASPT1371	11	Lethrinus	xanthochilus	31.6	524	Female			1.612
ASPT1372	11	Lethrinus	xanthochilus	36.6	808	Female			7.55
ASPT1373	11	Lethrinus	xanthochilus	35.8	761	Male			1.025
ASPT1455	1	Lethrinus	xanthochilus	30	462	Female	F	MAT	5.164	0.0662	3	4	3	3
ASPT1456	1	Lethrinus	xanthochilus	32.5	575	Female	F	MAT	5.866	0.069	3	3		3
ASPT1457	1	Lethrinus	xanthochilus	37.5	831	Female	M		1.874	0.0855	4	4		4
ASPT1458	1	Lethrinus	xanthochilus	36.2	747	Male	M		1.49	0.0983	5	5		5
ASPT1459	1	Lethrinus	xanthochilus	37.9	887	Male	M		1.35	0.1168	4	4		4
ASPT1460	1	Lethrinus	xanthochilus	33.2	612	Female	F	IMM	1.968	0.0611	2	2		2
ASPT1461	1	Lethrinus	xanthochilus	34.7	684	Male	M		1.436	0.084	3	3		3
ASPT1462	1	Lethrinus	xanthochilus	41.9	1209	Male	M		3.839	0.1725	11	11		11
ASPT1483	1	Lethrinus	xanthochilus	38.7	1018	Male	M		1.234	0.1445	9	9		9
ASPT1484	1	Lethrinus	xanthochilus	42.3	1265	Female	F	IMM	3.106	0.0805	4	4		4
ASPT1489	2	Lethrinus	xanthochilus	45.6	1567	Male	M		0.974	0.2459	18	19	18	18
ASPT1490	2	Lethrinus	xanthochilus	35.4	698	Female	F	MAT	3.855	0.0843	2	4	4	4
ASPT1491	2	Lethrinus	xanthochilus	32.8	556	Female	F	MAT	3.321	0.0715	2	3	3	3
ASPT1492	2	Lethrinus	xanthochilus	35.6	740	Female	F	MAT	5.936	0.0787	2	3	3	3
ASPT1493	2	Lethrinus	xanthochilus	37.2	828	Female	F	MAT	5.536	0.0757	3	3		3
ASPT1533	2	Lethrinus	xanthochilus	34.8	650	Male			0.794	0.0784	2	3	3	3
ASPT1534	2	Lethrinus	xanthochilus	34.1	638	Female			3.175	0.0823	2	3	3	3
ASPT1535	2	Lethrinus	xanthochilus	40.3	1137	Male			0.847	0.1846	12	11	12	12
ASPT1536	2	Lethrinus	xanthochilus	34.5	669	Female			1.11	0.0807	4	4		4
ASPT1537	2	Lethrinus	xanthochilus	37.7	854	Male			0.598	0.1256	8	7	7	7
ASPT1538	2	Lethrinus	xanthochilus	37.5	869	Male			1.052	0.0915	4	4		4
ASPT1540	2	Lethrinus	xanthochilus	39	934	Female			0.529	0.1168	5	5		5
ASPT1583	2	Lethrinus	xanthochilus	38.9	922	Male			0.775	0.1187	4	4		4
ASPT1584	2	Lethrinus	xanthochilus	40.8	975	Male			0.776	0.1521	8	8		8
ASPT1585	2	Lethrinus	xanthochilus	39.2	988	Male			2.157	0.1548	9	7	9	9
ASPT1586	2	Lethrinus	xanthochilus	39.6	919	Male			1.079	0.1159	6	7	7	7
ASPT1997	7	Lethrinus	xanthochilus	37.2	804	Male			3.924
ASPT1998	7	Lethrinus	xanthochilus	34.3	612	Female			3.136
ASPT1999	7	Lethrinus	xanthochilus	39.8	1044	Female			3.814
ASPT2000	7	Lethrinus	xanthochilus	39.5	972	Female			2.609
ASPT2001	7	Lethrinus	xanthochilus	34.7	664	Female			3.475
ASPT2002	7	Lethrinus	xanthochilus	41.2	1194	Male			3.546
ASPT2003	7	Lethrinus	xanthochilus	38.5	873	Male			3.745
ASPT2004	7	Lethrinus	xanthochilus	31.7	478	Male			6.784
ASPT2005	7	Lethrinus	xanthochilus	42.3	1191	Female			2.12
ASPT2006	7	Lethrinus	xanthochilus	37.2	794	Female			2.27
ASPT2007	7	Lethrinus	xanthochilus	36.6	998	Female			4.945
ASPT2008	7	Lethrinus	xanthochilus	37.4	891	Female			3.552
ASPT2009	7	Lethrinus	xanthochilus	34.7	705	Female			6.008
ASPT2010	7	Lethrinus	xanthochilus	37.3	810	Female			4.797
ASPT2011	7	Lethrinus	xanthochilus	36.6	812	Female			4.454
ASPT2012	7	Lethrinus	xanthochilus	37.2	805	Female			2.791
ASPT2013	7	Lethrinus	xanthochilus	34.6	846	Female			2.318
ASPT2014	7	Lethrinus	xanthochilus	38	896	Female			3.248
ASPT2015	7	Lethrinus	xanthochilus	33.4	578	Female			1.894
ASPT2016	7	Lethrinus	xanthochilus	39.7	1104	Female			4.023
ASPT2017	7	Lethrinus	xanthochilus	35.3	677	Female			8.74
ASPT2018	7	Lethrinus	xanthochilus	35.8	721	Female			3.763
ASPT2019	7	Lethrinus	xanthochilus	36.2	724	Female			4.455
ASPT2079	8	Lethrinus	xanthochilus	39.5	1005	Male			1.546
ASPT2080	8	Lethrinus	xanthochilus	40.2	1011	Male			1.636
ASPT2081	8	Lethrinus	xanthochilus	35.3	626	Female			5.024
ASPT2082	8	Lethrinus	xanthochilus	31.8	588	Female			5.072
ASPT2083	8	Lethrinus	xanthochilus	35.4	730	Female			5.637
ASPT2084	8	Lethrinus	xanthochilus	40	1032	Male			2.434
ASPT2085	8	Lethrinus	xanthochilus	33.1	600	Female			4.566
ASPT2114	9	Lethrinus	xanthochilus	38.5	886	Male			2.367
ASPT2115	9	Lethrinus	xanthochilus	39.8	959	Male			2.597
ASPT2116	9	Lethrinus	xanthochilus	36.6	749	Female			14.451
ASPT2117	9	Lethrinus	xanthochilus	35	731	Female			19.328
ASPT2127	9	Lethrinus	xanthochilus	40.6	1093	Male			272
ASPT2128	9	Lethrinus	xanthochilus	38.7	983	Female			17.075
ASPT2129	9	Lethrinus	xanthochilus	41.6	1071	Male			2.711
ASPT2130	9	Lethrinus	xanthochilus	31.7	549	Female			5.531
ASPT2131	9	Lethrinus	xanthochilus	30.7	491	Female			3.23
ASPT2132	9	Lethrinus	xanthochilus	37.2	871	Male			1.459
ASPT2137	9	Lethrinus	xanthochilus	40.8	1148	Male			10.853
ASPT2138	9	Lethrinus	xanthochilus	34.3	634	Female			14.801
ASPT2139	9	Lethrinus	xanthochilus	35.7	725	Female			26.401
ASPT2140	9	Lethrinus	xanthochilus	38.8	997	Male			3.96
ASPT2141	9	Lethrinus	xanthochilus	48.4	1347	Male			2.77
ASPT2178	9	Lethrinus	xanthochilus	45	1449	Male			0.18
ASPT2179	9	Lethrinus	xanthochilus	33.2	614	Female			0.42
ASPT2180	9	Lethrinus	xanthochilus	37.2	836	Male			0.074
ASPT2181	9	Lethrinus	xanthochilus	33.4	641	Female			0.39
ASPT2182	9	Lethrinus	xanthochilus	37	880	Female			0.06
ASPT2183	9	Lethrinus	xanthochilus	41	1070	Female			0.024
ASPT2198	10	Lethrinus	xanthochilus	37.9	833	Female			0.003
ASPT2199	10	Lethrinus	xanthochilus	36.8	863	Male			4
ASPT2200	10	Lethrinus	xanthochilus	40	973	Male			2
ASPT2201	10	Lethrinus	xanthochilus	34.7	666	Female			12
ASPT2226	10	Lethrinus	xanthochilus	38.7	1016	Female			20.3
ASPT2227	10	Lethrinus	xanthochilus	40	1068	Female			23.3
ASPT2245	10	Lethrinus	xanthochilus	35.3	778	Female			22
ASPT2246	10	Lethrinus	xanthochilus	32.6	582	Female			9.7
ASPT2247	10	Lethrinus	xanthochilus	34.7	690	Female			4.822
ASPT2248	10	Lethrinus	xanthochilus	40.3	1082	Male			1.901
ASPT2249	10	Lethrinus	xanthochilus	39.6	990	Male			0.844
ASPT2250	10	Lethrinus	xanthochilus	37.5	901	Female			4.811
ASPT2251	10	Lethrinus	xanthochilus	37.9	805	Male			1.319
ASPT2252	10	Lethrinus	xanthochilus	23.4	221	Female			2.471
ASPT2253	10	Lethrinus	xanthochilus	25.3	290	Male			4.601
ASPT2254	10	Lethrinus	xanthochilus	40.4	1145	Female			30.925
ASPT2255	10	Lethrinus	xanthochilus	38	889	Female			1.286
ASPT2256	10	Lethrinus	xanthochilus	37.7	824	Female			1.378
ASPT2257	10	Lethrinus	xanthochilus	34.2	671	Female			2.372
ASPT2258	10	Lethrinus	xanthochilus	35.3	736	Female			2.348
ASPT2270	12	Lethrinus	xanthochilus	36.4	755	Female			1.03
ASPT2271	12	Lethrinus	xanthochilus	35.6	660	Female			0.722
ASPT2272	12	Lethrinus	xanthochilus	34.8	941	Male			1.607
ASPT-333	12	Lethrinus	xanthochilus	39.5	1014	Male			2.996
ASPT-365	10	Lethrinus	xanthochilus	35.9	730	Female	F	MAT	11.78	0.0924	4	5	5	5
ASPT-366	10	Lethrinus	xanthochilus	39.2	952	Male	M		5.854	0.1233	5	5		5
ASPT-367	10	Lethrinus	xanthochilus	37.4	821	Female	F	MAT	6.623	0.0864	5	5		5
ASPT-368	10	Lethrinus	xanthochilus	37.9	867	Male	M		0.725	0.0939	4	3	4	4
ASPT-369	10	Lethrinus	xanthochilus	36.4	789	Female	F	MAT	12.758	0.0774	4	4		4
ASPT-370	10	Lethrinus	xanthochilus	32	548	Female	F	IMM	3.513	0.0604	2	3	2	2
ASPT-371	10	Lethrinus	xanthochilus	39.1	922	Male	M		1.119	0.122	7	7		7
ASPT-372	10	Lethrinus	xanthochilus	22.5	169	Male	F	IMM	0.212	0.0358	1	1		1
ASPT-373	10	Lethrinus	xanthochilus	39.6	1068	Male			0.535	0.1515	8	8		8
ASPT-374	10	Lethrinus	xanthochilus	39.5	970	Male	M		0.586	0.1272	6	6		6
ASPT-375	10	Lethrinus	xanthochilus	39.5	1145	Male	M		0.726	0.1539	13	11	11	11
ASPT-376	10	Lethrinus	xanthochilus	39.5	950	Male	M		0.505	0.1013	4	4		4
ASPT-377	10	Lethrinus	xanthochilus	37.2	790	Male	M		0.468	0.0842	3	4	4	4
ASPT-378	10	Lethrinus	xanthochilus	38.3	886	Male	M		0.281	0.0953	3	3		3
ASPT-407	11	Lethrinus	xanthochilus	32.4	560	Male			0.333
ASPT-412	11	Lethrinus	xanthochilus	28.9	420	Female			7.789	0.0525	3	2	2	2
ASPT-413	11	Lethrinus	xanthochilus	33.2	610	Female	F	MAT	8.783	0.0606	3	2	2	2
ASPT-439	11	Lethrinus	xanthochilus	39.5	985	Male	M		1.118	0.1	4	4		4
ASPT-440	11	Lethrinus	xanthochilus	40.2	1039	Female	F	MAT	6.581	0.0977	5	5		5
ASPT-441	11	Lethrinus	xanthochilus	38	910	Male	M		0.362	0.0952	4	4		4
ASPT-442	11	Lethrinus	xanthochilus	39.3	1125	Male	M		0.698
ASPT-443	11	Lethrinus	xanthochilus	33.2	555	Female	F	IMM	2.581	0.0643	2	3	2	2
ASPT-444	11	Lethrinus	xanthochilus	31.3	525	Female			3.095	0.0639	2	2		2
ASPT-445	11	Lethrinus	xanthochilus	32.1	535	Female	F	MAT	4.247
ASPT-446	11	Lethrinus	xanthochilus	35.7	685	Female	F	IMM	4.828	0.0717	3	3		3
ASPT-447	11	Lethrinus	xanthochilus	37.7	815	Female	F	MAT	4.235	0.0933	3	3		3
ASPT-448	11	Lethrinus	xanthochilus	35.4	710	Female			3.968	0.1073	4	5	4	4
ASPT-449	11	Lethrinus	xanthochilus	28.1	370	Male	F	IMM	0.81	0.0452	2	2		2
ASPT-453	11	Lethrinus	xanthochilus	37.7	855	Female	M		2.102	0.0885	4	4		4
ASPT-454	11	Lethrinus	xanthochilus	24	215	Male	BISEX	IMM	0.102	0.0415	2	2		2
ASPT-455	11	Lethrinus	xanthochilus	26.6	335	Male	F	IMM	0.105	0.0409	2	2		2
ASPT-456	11	Lethrinus	xanthochilus	34.9	659	Female	F	MAT	10.359	0.0683	4	3	3	3
ASPT-467	11	Lethrinus	xanthochilus	27.1	355	Female	F	MAT	3.953	0.0496	2	3	2	2
ASPT-471	11	Lethrinus	xanthochilus	37.3	906	Male	M		2.527	0.0914	4	3	4	4
ASPT-473	11	Lethrinus	xanthochilus	32.9	604	Female	F	MAT	15.432	0.072	3	3		3
ASPT-474	11	Lethrinus	xanthochilus	36.5	717	Male	M		2.118	0.0749	3	3		3
ASPT-550	12	Lethrinus	xanthochilus	39.9	1056	Male	M		1.335	0.1369	7	7		7
ASPT-551	12	Lethrinus	xanthochilus	33.1	605	Male	F	IMM	2.123	0.0604	2	3	2	2
ASPT-552	12	Lethrinus	xanthochilus	33.8	648	Female	F	MAT	3.138	0.068	3	3		3
ASPT-620	1	Lethrinus	xanthochilus	32.1	584	Male	F	IMM	0.804	0.0558	2	2		2
ASPT-621	1	Lethrinus	xanthochilus	29.4	411	Male	BISEX	IMM	0.237	0.0506	2	2		2
ASPT-696	1	Lethrinus	xanthochilus	38.7	1030	Female	F	MAT	0.63	0.1482	9	9		9
ASPT-697	1	Lethrinus	xanthochilus	39.1	973	Male	M		1.058	0.0898	5	5		5
ASPT-698	1	Lethrinus	xanthochilus	32	518	Female	F	MAT	5.615	0.0561	3	3		3
ASPT-699	1	Lethrinus	xanthochilus	37.5	787	Female	F	MAT	7.179	0.0758	4	3	3	3
ASPT-700	1	Lethrinus	xanthochilus	26.5	302	Male	F	IMM	0.095	0.0284	2	2		2
ASPT-742	3	Lethrinus	xanthochilus	36.6	906	Male	F	MAT	11.544	0.1033	6	6		6
ASPT-744	3	Lethrinus	xanthochilus	40	1109	Male	M		0.733	0.1088	7	6	6	6
ASPT-746	3	Lethrinus	xanthochilus	31.2	472	Female	F	MAT	6.76	0.0583	2	2		2
ASPT-748	3	Lethrinus	xanthochilus	39.5	1047	Male	M		0.279	0.119	6	6		6
ASPT-750	3	Lethrinus	xanthochilus	34.5	733	Female	F	MAT	8.14	0.0699	4	4		4
ASPT-757	3	Lethrinus	xanthochilus	41	1287	Female	F	MAT	24.191	0.1207	6	6		6
ASPT-759	3	Lethrinus	xanthochilus	40	1122	Female	F	MAT	18.953	0.1519	8	8		8
ASPT-761	3	Lethrinus	xanthochilus	40	1122	Male	M		0.877	0.1495	8	9	8	8
ASPT-765	3	Lethrinus	xanthochilus	38.5	991	Male	M		0.46	0.1139	7	7		7
ASPT-767	3	Lethrinus	xanthochilus	40.5	1131	Male	M		1.028	0.1667	9	9		9
ASPT-866	5	Lethrinus	xanthochilus	39.4	967	Male	M		1.726	0.1612	12	12		12
ASPT-867	5	Lethrinus	xanthochilus	39.8	1068	Male	M		4.071	0.1313	7	7		7
ASPT-868	5	Lethrinus	xanthochilus	36.9	906	Male	M		4.018	0.1102	6	6		6
ASPT-869	5	Lethrinus	xanthochilus	37.6	857	Male	F	MAT	5.452	0.1084	6	6		6
ASPT-870	5	Lethrinus	xanthochilus	32.8	615	Female	F	MAT	16.58	0.0668	2	2		2
ASPT-878	5	Lethrinus	xanthochilus	36.5	841	Female	F	MAT	34.678	0.082	4	4		4
ASPT-881	5	Lethrinus	xanthochilus	38.1	905	Female	M		4.166	0.0842	3	4	4	4
ASPT-963	6	Lethrinus	xanthochilus	41.7	1220	Male	M		10.116
ATE-2522	3	Lethrinus	xanthochilus	48.6	2198	Female			40.859
ATJA-1702	1	Lethrinus	xanthochilus	33.6	695	Male			1.263
ATJL-27	10	Lethrinus	xanthochilus	41.1	1090	Male	M		0.441	0.0772	3	3		3
ATJL-80	10	Lethrinus	xanthochilus	39	999	Male	M	MAT	2.1	0.1009	5	5		5
ATJL-81	10	Lethrinus	xanthochilus	40	1002	Male	F	MAT	6.1	0.1253	6	6		6
ATJL-82	10	Lethrinus	xanthochilus	38	855	Male	M		0.5	0.1045	6	6		6
ATJL-83	10	Lethrinus	xanthochilus	33.5	654	Female	F	MAT	11.4	0.0681	3	3		3
ATJL-84	10	Lethrinus	xanthochilus	39.5	1099	Male			0.4	0.0958	4	4		4
ATJL-85	10	Lethrinus	xanthochilus	41	1156	Female	F	MAT	8.4	0.1055	5	5		5
ATJL-86	10	Lethrinus	xanthochilus	38.1	947	Male			1.6	0.0941	4	4		4
SMLX001		Lethrinus	xanthochilus	10.1	22	Female	F	IMM		0.006				0.353425

## Sheet: Lutjanus gibbus
Fish_ID	Month	Genus	Species	Length_cm	Weight_g	SexMacro	SexHisto	Maturity	GonWeight_g	Oto_wt_g	Age1_yr	Age2_yr	Age3_yr	ConcensusAge
AATT 1039	4	Lutjanus	gibbus	27.6	420	Female			2.262	0.105	10	10		10
AATT 1040	4	Lutjanus	gibbus	28.2	433	Female			2.052	0.0971	9	8	7	8
AATT 1041	4	Lutjanus	gibbus	29.2	513	Female			1.982	0.0967	8	9	7	8
AATT 1042	4	Lutjanus	gibbus	27.7	390	Female			1.992	0.0947	9	9		9
AATT 1043	4	Lutjanus	gibbus	27.5	410	Female			2.401	0.0911
AATT 1044	4	Lutjanus	gibbus	27.2	404	Female			2.36	0.0871	5	4	5	5
AATT 1045	4	Lutjanus	gibbus	30.5	563	Male			7.332	0.0891	5	5		5
AATT 1046	4	Lutjanus	gibbus	35.3	332	Female	M		1.363	0.0819	5	6	5	5
AATT 1047	4	Lutjanus	gibbus	34	772	Male			1.214	0.1072	6	6		6
AATT 985	3	Lutjanus	gibbus	29	547	Female			3.423	0.1274	11	11		11
AATT 986	3	Lutjanus	gibbus	34.2	877	Male			0.082	0.1191	7	7		7
AATT 987	3	Lutjanus	gibbus	26.5	358	Male			0.106	0.0738	4	4		4
AATT 988	3	Lutjanus	gibbus	27	463	Female			3.112	0.1045	11	10	9	10
AATT 989	3	Lutjanus	gibbus	36.2	1034	Male			3.4	0.1365	7	7		7
AATT 991	3	Lutjanus	gibbus	27.3	392	Female			1.744	0.1313	16	13	13	13
AATT1076	4	Lutjanus	gibbus	34.5	842	Male			14.023	0.1101	7	5	6	6
AATT1077	4	Lutjanus	gibbus	28.6	444	Female			2.033	0.1013	10	11	10	10
AATT1078	4	Lutjanus	gibbus	23	240	Female			0.888	0.059	4	4		4
AATT1079	4	Lutjanus	gibbus	36.4	990	Male			30.536	0.1217	6	8	7	7
AATT1080	4	Lutjanus	gibbus	35.2	906	Male			19.597	0.1215	6	7	6	6
AATT1081	4	Lutjanus	gibbus	26.4	368	Male			0.19	0.0777	3	3		3
AATT1082	4	Lutjanus	gibbus	29.6	569	Male			0.321	0.0865	5	4	3	4
AATT1194	10	Lutjanus	gibbus	28.5	383	Female			2	0.0988	8	8		8
AATT1195	10	Lutjanus	gibbus	30.4	564	Male			3	0.0947	4	4		4
AATT1196	10	Lutjanus	gibbus	30	501	Female			1	0.0815	7	7		7
AATT1197	10	Lutjanus	gibbus	33.2	786	Male			22	0.1017	7	7		7
AATT1198	10	Lutjanus	gibbus	26.2	375	Male			2	0.0767	5	4	4	4
AATT1199	10	Lutjanus	gibbus	24.8	297	Male			0.001	0.0651	4	4		4
AATT1200	10	Lutjanus	gibbus	26.7	358	Male			2	0.0754	4	5	4	4
AATT1207	9	Lutjanus	gibbus	34	729	Male			2	0.1123	9	7	7	7
AATT1208	9	Lutjanus	gibbus	36.5	1029	Male			1	0.1526	9	8	9	9
AATT1209	9	Lutjanus	gibbus	33.5	774	Male			4	0.1028	7	7		7
AATT1247	10	Lutjanus	gibbus	30	507	Female			8.275	0.1205	10	10		10
AATT1248	10	Lutjanus	gibbus	39.3	1103	Male			6.347	0.1363	10	10		10
AATT1249	10	Lutjanus	gibbus	27.8	429	Female			8.734	0.0971	8	7	7	7
AATT1250	10	Lutjanus	gibbus	28.3	493	Female			7.538	0.111	8	9	8	8
AATT1251	10	Lutjanus	gibbus	37.8	1102	Male			1.821	0.1115	7	6	6	6
AATT1252	10	Lutjanus	gibbus	34.7	837	Male			2.036	0.1575	9	11	9	9
AATT1253	10	Lutjanus	gibbus	39.5	1090	Female	M		2.305	0.1845	15	15	13	15
AATT1254	10	Lutjanus	gibbus	26.8	995	Male	F	MAT	0.874	0.2111	19	17	18	18
AATT1255	10	Lutjanus	gibbus	28.3	465	Female			3.491	0.0862	6	6		6
AATT1256	10	Lutjanus	gibbus	29.6	478	Female			2.618	0.0891	5	6	5	5
AATT1257	10	Lutjanus	gibbus	31.2	543	Female			4.294	0.1848	21	20	20	20
AATT1258	10	Lutjanus	gibbus	37.2	456	Male			7.112	0.1085	9	8	8	8
AATT1259	10	Lutjanus	gibbus	32.4	448	Male			5.942	0.1385	8	10	8	8
AATT1260	10	Lutjanus	gibbus	28.2	430	Female			4.144	0.0939	7	8	6	7
AATT1261	10	Lutjanus	gibbus	27.4	359	Female			3.589	0.0823	5	6	5	5
AATT1285	10	Lutjanus	gibbus	21.7	191	Male			0.3	0.0477	3	3		3
AATT1505	10	Lutjanus	gibbus	37	1124	Male			12.8	0.1278	7	8	8	8
AATT1506	10	Lutjanus	gibbus	37.5	1155	Male			6.8	0.1364	7	8	8	8
AATT1507	10	Lutjanus	gibbus	41.5	1342	Male			0.005	0.2721	18	19	17	18
AATT1508	10	Lutjanus	gibbus	31.8	592	Female			10.8	0.1782	25	24	23	24
AATT1509	10	Lutjanus	gibbus	38	1077	Male			0.1	0.1586	11	12	10	11
AATT1510	10	Lutjanus	gibbus	30.7	487	Female			6.3	0.1384	10	10	9	10
AATT1511	10	Lutjanus	gibbus	40	1286	Male			9.6	0.2455	17	18	17	17
AATT1512	10	Lutjanus	gibbus	28.6	540	Female			8.5	0.1055	5	4	5	5
AATT1513	10	Lutjanus	gibbus	25	312	Male			0.2	0.0618	4	3	3	3
AATT1514	10	Lutjanus	gibbus	26.5	394	Male	F	MAT	4.4	0.0917	10	11	10	10
AATT1515	10	Lutjanus	gibbus	27.6	387	Female			5.9	0.0859	4	4		4
AATT1524	11	Lutjanus	gibbus	30.7	556	Male			1.1	0.0979	6	6		6
AATT1525	11	Lutjanus	gibbus	31	677	Male			3	0.0992	5	5		5
AATT1526	11	Lutjanus	gibbus	30	590	Male			3.3	0.0906	5	4	4	4
AATT1527	11	Lutjanus	gibbus	37.3	1075	Male			18.4	0.1291	9	8	8	8
AATT1528	11	Lutjanus	gibbus	39.4	1217	Female	M		4	0.2006	21	18	18	18
AATT1529	11	Lutjanus	gibbus	28.6	457	Female			7.3	0.1092	7	6	6	6
AATT1545	11	Lutjanus	gibbus	35.6	810	Male			9.3	0.1169	5	5		5
AATT1546	11	Lutjanus	gibbus	36.4	985	Female	M		2.8	0.1448	8	8		8
AATT1547	11	Lutjanus	gibbus	32.5	745	Male			13.6	0.0987	5	5		5
AATT1548	11	Lutjanus	gibbus	36.1	784	Male			1.3	0.1133	7	6	5	6
AATT1549	11	Lutjanus	gibbus	35.8	856	Male			5.3	0.1046	5	5		5
AATT1550	11	Lutjanus	gibbus	28.2	461	Female			6.8	0.1063	7	8	7	7
AATT1551	11	Lutjanus	gibbus	30.7	526	Female			4.6	0.1681	22	23	22	22
AATT1569	11	Lutjanus	gibbus	23.6	266	Female			6	0.0598	3	3		3
AATT-160	10	Lutjanus	gibbus	32.5	700	Male	M		2.208	0.0882	4	4		4
AATT-161	10	Lutjanus	gibbus	28.8	420	Female	F	MAT	5.058	0.0926	5	5		5
AATT1621	12	Lutjanus	gibbus	36.3	900	Male			1.404	0.1542	7	7		7
AATT1622	12	Lutjanus	gibbus	36.7	984	Male			2.964	0.1562	12	10	10	10
AATT1623	12	Lutjanus	gibbus	35.6	903	Male			1.459	0.1473	10	8	9	9
AATT1624	12	Lutjanus	gibbus	36.1	895	Male			2.565	0.1628	12	11	11	11
AATT1625	12	Lutjanus	gibbus	23.7	291	Male			6.26	0.056	2	2		2
AATT1626	12	Lutjanus	gibbus	27.5	325	Female			2.7	0.0991	8	5	8	8
AATT1627	12	Lutjanus	gibbus	37.4	948	Male			2.737	0.1618	11	9	9	9
AATT1628	12	Lutjanus	gibbus	39	1276	Male			2.988	0.2008	17	18	19	18
AATT1629	12	Lutjanus	gibbus	37.8	206	Male			18.451	0.1443	7	7		7
AATT1630	12	Lutjanus	gibbus	27.8	206	Female			3.855	0.0904	5	5		5
AATT1631	12	Lutjanus	gibbus	28.2	430	Female			3.283	0.073	5	5		5
AATT1632	12	Lutjanus	gibbus	28.2	459	Female			2.949	0.1093	6	7	6	6
AATT1648	1	Lutjanus	gibbus	30.4	544	Female			6.207	0.159	10	10		10
AATT1649	1	Lutjanus	gibbus	25.7	318	Female			1.285	0.0661	3	3		3
AATT1650	1	Lutjanus	gibbus	29.3	439	Female			8.139	0.1261	14	12	12	12
AATT1651	1	Lutjanus	gibbus	29.2	425	Female			6.082	0.0934	7	7		7
AATT1652	1	Lutjanus	gibbus	26	359	Male			2.729	0.0759	4	4		4
AATT1653	1	Lutjanus	gibbus	35.2	814	Male			2.307	0.1364	9	9		9
AATT1654	1	Lutjanus	gibbus	36	905	Male			2.53	0.1268	8	10	8	8
AATT1655	1	Lutjanus	gibbus	27.7	399	Female			4.209	0.1067	6	6		6
AATT1656	1	Lutjanus	gibbus	27.8	425	Female			3.513	0.0863	6	6		6
AATT1657	1	Lutjanus	gibbus	39.5	1113	Male			1.761	0.2214	18	17	18	18
AATT1658	1	Lutjanus	gibbus	37.2	1080	Female	M		4.018	0.1488	9	7	8	8
AATT1659	1	Lutjanus	gibbus	32.1	586	Female			3.578	0.0909	5	5		5
AATT1660	1	Lutjanus	gibbus	26.7	379	Female			3.447	0.0819	5	5		5
AATT1664	1	Lutjanus	gibbus	25.7	318	Female			0.993	0.0509	2	2		2
AATT1665	1	Lutjanus	gibbus	30	512	Male			1.153	0.1023	5	5		5
AATT1666	1	Lutjanus	gibbus	26.6	331	Female			1.303	0.0816	4	4		4
AATT1667	1	Lutjanus	gibbus	35.5	866	Male			1.525	0.1473	12	10	11	11
AATT1668	1	Lutjanus	gibbus	26.7	355	Female			2.046	0.0855	6	5	6	6
AATT1669	1	Lutjanus	gibbus	27.8	361	Female			2.582	0.0915	6	6		6
AATT1670	1	Lutjanus	gibbus	30.7	531	Female			3.464	0.1511	12	11	13	12
AATT1671	1	Lutjanus	gibbus	37.8	1020	Male			1.577	0.2279	16	19	19	19
AATT1672	1	Lutjanus	gibbus	26.2	341	Female			3.151	0.0855	6	4	6	6
AATT1673	1	Lutjanus	gibbus	25.8	309	Female			2.226	0.0862	7	8	6	7
AATT1674	1	Lutjanus	gibbus	37.8	934	Male			0.95	0.1459	11	9	10	10
AATT1675	1	Lutjanus	gibbus	23.8	261	Male			0.329	0.0604	3	3		3
AATT1676	1	Lutjanus	gibbus	35.8	902	Male			1.003	0.1358	10	7	10	10
AATT-237	11	Lutjanus	gibbus	28.3	495	Male	M		1.173	0.0857	6	4	4	4
AATT-267	11	Lutjanus	gibbus	29	420	Female	F	MAT	6.961	0.0964	7	7	6	7
AATT-268	11	Lutjanus	gibbus	28.2	460	Female	F	MAT	6.814	0.1114	12	7	7	7
AATT-272	11	Lutjanus	gibbus	28.2	435	Male	M		2.14	0.088	5	4	4	4
AATT-273	11	Lutjanus	gibbus	25.7	365	Female	F	MAT	1.473	0.072	4	4		4
AATT-458	1	Lutjanus	gibbus	31.5	652	Female	F	MAT	4.849	0.158	12	11	12	12
AATT-459	1	Lutjanus	gibbus	28.3	454	Female	F	MAT	5.776	0.1063	8	6	8	8
AATT-462	1	Lutjanus	gibbus	33	673	Female	F	IMM	3.393	0.183	27	25	27	27
AATT-464	1	Lutjanus	gibbus	29.6	469	Female	F	MAT	5.216	0.1084	11	8	11	11
AATT517	3	Lutjanus	gibbus	25.5	360	Male			0.851	0.0691	4	4		4
AATT518	3	Lutjanus	gibbus	34.6	974	Male			27.998	0.0953	6	5	4	5
AATT519	3	Lutjanus	gibbus	30.7	584	Male	M		2.743	0.0929	5	4	4	4
AATT520	3	Lutjanus	gibbus	34.3	877	Male	M		33.768	0.0989	7	5	7	7
AATT521	3	Lutjanus	gibbus	32.2	743	Male	M		8.948	0.0876	5	4	4	4
AATT522	3	Lutjanus	gibbus	24.3	297	Female	F	MAT	1.038	0.0657	4	4		4
AATT628	5	Lutjanus	gibbus	25.6	276	Female	F	IMM	1.056	0.0522	3	3		3
AATT679	11	Lutjanus	gibbus	30	568	Female	F	MAT	13.338	0.1063	7	9	8	8
AATT698	12	Lutjanus	gibbus	34.7	762	Male	M		5.873	0.0979	4	6	6	6
AATT700	12	Lutjanus	gibbus	27.2	393	Female	F	MAT	2.144	0.0855	7	5	5	5
AATT701	12	Lutjanus	gibbus	29.4	479	Male	M		2.059	0.0818	4	4		4
AATT703	12	Lutjanus	gibbus	24.7	293	Male			2.069	0.0626	4	4		4
AATT705	12	Lutjanus	gibbus	27.2	208	Male	F	IMM	0.497	0.0493	3	3		3
AATT716	12	Lutjanus	gibbus	27.8	456	Female	F	MAT	4.143	0.1108	7	5	6	6
AATT718	12	Lutjanus	gibbus	29.7	489	Female	F	MAT	4.175	0.1414	11	11		11
AATT719	12	Lutjanus	gibbus	28.4	418	Female	F	MAT	3.517	0.1024	7	6	6	6
AATT721	12	Lutjanus	gibbus	26.4	383	Female	F	MAT	3.641	0.0943	6	5	5	5
AATT722	12	Lutjanus	gibbus	27.5	407	Female	F	MAT	2.897	0.108	6	5	5	5
AATT723	12	Lutjanus	gibbus	26.6	415	Male			7.91	0.0639	5	4	4	4
AATT736	12	Lutjanus	gibbus	37	939	Male	M		2.679	0.2133	18	18	20	18
AATT743	12	Lutjanus	gibbus	37	978	Male			0.807	0.1577	10	8	10	10
AATT745	12	Lutjanus	gibbus	34.5	1074	Male	M		3	0.1297	8	7	7	7
AATT767	12	Lutjanus	gibbus	37.5	1063	Male	M		1.718	0.1363	10	8	9	9
AATT768	12	Lutjanus	gibbus	29.5	467	Female	F	MAT	3.101	0.0927	6	6		6
AATT769	12	Lutjanus	gibbus	30.4	521	Female	F	MAT	2.402	0.1212	9	9	10	9
AATT770	12	Lutjanus	gibbus	27.7	384	Female	F	MAT	2.029	0.0835	6	6		6
AATT841	1	Lutjanus	gibbus	30.5	512	Female	F	MAT	4.792	0.1247	9	9		9
AATT842	1	Lutjanus	gibbus	29.5	457	Female	F	MAT	6.34	0.1045	8	8	7	8
AATT845	1	Lutjanus	gibbus	27.9	378	Female	F	MAT	3.524	0.0928
AATT846	1	Lutjanus	gibbus	30.6	525	Female	F	MAT	4.033	0.2021	25	25	26	25
AATT849	1	Lutjanus	gibbus	32.5	701	Male	M		1.831	0.1359	6	7	7	7
AATT850	1	Lutjanus	gibbus	35.9	890	Male	M		2	0.1382	7	9	9	9
AATT851	1	Lutjanus	gibbus	31.5	602	Male	M		2.853	0.0923	5	5		5
AATT852	1	Lutjanus	gibbus	29.6	495	Female	F	MAT	4.021	0.1447	12	12		12
AATT853	1	Lutjanus	gibbus	27	365	Female	F	MAT	4	0.1063	8	8		8
AATT854	1	Lutjanus	gibbus	25.5	329	Female	F	MAT	2.352	0.0702	5	5		5
AATT855	1	Lutjanus	gibbus	32	624	Male	M		2	0.0972	5	5		5
AATT920	2	Lutjanus	gibbus	28.9	214	Male	F	IMM	2.167	0.0425	3	2	2	2
AATT921	2	Lutjanus	gibbus	24.6	210	Male	F	IMM	0.474	0.0593	3	3		3
AATT922	2	Lutjanus	gibbus	19.5	149	Male	F	IMM	0.331	0.0337	2	2		2
ASPT 1634	3	Lutjanus	gibbus	24.4	291	Male			0.268	0.0522	3	3		3
ASPT 1635	3	Lutjanus	gibbus	21.7	211	Male			0.404	0.0511	2	2		2
ASPT 1665	3	Lutjanus	gibbus	29.4	494	Male			1.267	0.084	4	4		4
ASPT 1681	3	Lutjanus	gibbus	27.4	403	Female			3.311	0.0852	6	6		6
ASPT 1683	3	Lutjanus	gibbus	35.8	1049	Male			2.309	0.1265	9	8	10	9
ASPT 898	6	Lutjanus	gibbus	30.1	514	Male			14.449	0.0759	4	4		4
ASPT-1027	7	Lutjanus	gibbus	30.8	565	Male	M		6.848	0.0752	4	4		4
ASPT-1028	7	Lutjanus	gibbus	38.1	1215	Male			32.093	0.1317	8	6	8	8
ASPT-1029	7	Lutjanus	gibbus	32.4	736	Male	F	IMM	12.377	0.1007	6	6		6
ASPT-1030	7	Lutjanus	gibbus	28.1	395	Male	M		0.574	0.0761	3	3		3
ASPT-1032	7	Lutjanus	gibbus	30.1	547	Male			5.116	0.0802	4	4		4
ASPT-1033	7	Lutjanus	gibbus	30.8	584	Male	M		4.927	0.0917	4	4		4
ASPT1088	8	Lutjanus	gibbus	27.9	392	Male			4.96	0.0635	3	3		3
ASPT1089	8	Lutjanus	gibbus	26.2	382	Female	F	MAT	8.377	0.0701	3	3		3
ASPT1091	8	Lutjanus	gibbus	28.1	428	Male			1.303	0.078	4	4		4
ASPT1100	8	Lutjanus	gibbus	29.3	489	Male			1.477	0.0822	4	4		4
ASPT1101	8	Lutjanus	gibbus	26.8	385	Male			4.803	0.0836	4	3	4	4
ASPT1102	8	Lutjanus	gibbus	26.9	398	Male	M		1.309	0.0771	4	5	6	5
ASPT1103	8	Lutjanus	gibbus	27.8	383	Male	F	IMM	5.469	0.0759	3	3		3
ASPT1104	8	Lutjanus	gibbus	26.6	770	Male	M		0.45	0.0747	6	4	5	5
ASPT1145	8	Lutjanus	gibbus	27.7	414	Female	F	MAT	5.177	0.0893	6	5	7	6
ASPT1146	8	Lutjanus	gibbus	31.7	584	Female	F	MAT	17.197	0.1487	15	16	17	16
ASPT1301	11	Lutjanus	gibbus	22.2	242	Male			5.07	0.0452	2	2		2
ASPT1375	11	Lutjanus	gibbus	31.1	612	Male			0.517	0.088	6	5	5	5
ASPT1377	11	Lutjanus	gibbus	29.1	552	Male			0.921	0.087	6	6		6
ASPT1395	12	Lutjanus	gibbus	22.9	246	Male	F	IMM	1.707	0.0487	2	2		2
ASPT1463	1	Lutjanus	gibbus	30.6	590	Female	F	MAT	5.428	0.1809	23	23	21	23
ASPT1500	2	Lutjanus	gibbus	26.9	380	Female	F	MAT	3.77	0.0745	6	4	6	6
ASPT1502	2	Lutjanus	gibbus	27.5	421	Female	F	MAT	3.495	0.0924	5	5		5
ASPT1505	2	Lutjanus	gibbus	28.1	441	Female	F	MAT	4.478	0.0899	7	7		7
ASPT1506	2	Lutjanus	gibbus	29.8	508	Female	F	MAT	3.041	0.1632	13	14	15	14
ASPT1507	2	Lutjanus	gibbus	31	570	Male	M		2.233	0.0821	4	4		4
ASPT1508	2	Lutjanus	gibbus	29.9	468	Female	F	MAT	6.129	0.1219	11	10	12	11
ASPT1510	2	Lutjanus	gibbus	26.3	349	Female	F	MAT	3.055	0.0674	4	3	4	4
ASPT1511	2	Lutjanus	gibbus	28.3	464	Female	F	MAT	5.058	0.1027	8	8		8
ASPT1514	2	Lutjanus	gibbus	29.5	486	Female	F	MAT	5.599	0.1058	7	10	10	10
ASPT1515	2	Lutjanus	gibbus	36.8	984	Male	M		0.552	0.1383
ASPT1517	2	Lutjanus	gibbus	36.9	1039	Male	M		15.555	0.1168	5	5		5
ASPT1548	2	Lutjanus	gibbus	26.4	387	Female			2.763	0.0555	3	3		3
ASPT1745	4	Lutjanus	gibbus	20.1	171	Male			0.812	0.0425	2	2		2
ASPT-224	9	Lutjanus	gibbus	32.9	704	Male	M		11.104	0.0898	5	5		5
ASPT-379	10	Lutjanus	gibbus	26.3	353	Female	F	MAT	5.829	0.071	5	5		5
ASPT-457	11	Lutjanus	gibbus	29.5	519	Male	M		3.08	0.0822	5	4	4	4
ASPT-458	11	Lutjanus	gibbus	27.6	402	Female	F	MAT	3.464	0.0743	4	4		4
ASPT-459	11	Lutjanus	gibbus	26.8	357	Female	F	MAT	3.917	0.0785	4	4		4
ASPT-460	11	Lutjanus	gibbus	25.8	338	Female	F	MAT	2.565	0.0716	4	4		4
ASPT-461	11	Lutjanus	gibbus	28.3	403	Female	F	MAT	2.776	0.1017	7	7		7
ASPT-478	11	Lutjanus	gibbus	36.6	915	Male	M		2.999	0.107	7	6	7	7
ASPT-479	11	Lutjanus	gibbus	28.1	489	Female	F	MAT	6.966	0.1169	10	8	9	9
ASPT-480	11	Lutjanus	gibbus	28.6	527	Female	F	MAT	4.872	0.1277	13	12	12	12
ASPT-540	12	Lutjanus	gibbus	33.3	813	Male	M		8.869	0.102	6	6		6
ASPT-541	12	Lutjanus	gibbus	27.5	382	Female	F	MAT	2.026	0.0932	7	5	7	7
ASPT-542	12	Lutjanus	gibbus	27.1	368	Female	F	MAT	3.001	0.0718	4	5	5	5
ASPT-544	12	Lutjanus	gibbus	32.2	687	Male			8.351	0.102	5	4	5	5
ASPT-546	12	Lutjanus	gibbus	27.1	407	Male	M		1.575	0.0734	4	4		4
ASPT-547	12	Lutjanus	gibbus	26.9	378	Female	F	MAT	2.703	0.0709	4	4		4
ASPT-548	12	Lutjanus	gibbus	27.7	417	Female	F	MAT	2.389	0.0783	5	5		5
ASPT-768	3	Lutjanus	gibbus	32.2	665	Male	M		3.088	0.0988	4	4		4
ASPT-769	3	Lutjanus	gibbus	26.7	409	Female	F	MAT	2.995	0.092	7	7		7
ASPT-771	3	Lutjanus	gibbus	30.5	610	Female	F	MAT	4.005	0.133	12	12	10	12
ASPT-775	3	Lutjanus	gibbus	31.3	603	Male			4.53	0.0917	5	5		5
ASPT-776	3	Lutjanus	gibbus	33.9	784	Male	M		19.045	0.1036	5	5		5
ASPT-777	3	Lutjanus	gibbus	28.2	461	Male	M		3.286	0.0717	4	5	4	4
ASPT-778	3	Lutjanus	gibbus	26.8	417	Male	F	IMM	8.981	0.0641	4	4		4
ASPT-781	3	Lutjanus	gibbus	24.3	316	Male	F	IMM	1.843	0.0617	3	3		3
ASPT-782	3	Lutjanus	gibbus	25.9	377	Male	F	IMM	5.069	0.0717	4	4		4
ASPT-783	3	Lutjanus	gibbus	23.6	247	Male	F	MAT	1.702	0.0513	2	2		2
ASPT-871	5	Lutjanus	gibbus	34.2	822	Male			10.107	0.1201	7	7		7
ASPT-872	5	Lutjanus	gibbus	28.4	426	Male			1.615	0.0721	5	5		5
ASPT-874	5	Lutjanus	gibbus	27.6	443	Male	F		3.457	0.0966	7	7		7
ASPT-879	5	Lutjanus	gibbus	27.4	437	Male	M		2.739	0.0747	4	4		4
AATT-144	9	Lutjanus	gibbus	23.5	224	Female	F	MAT	6.11		4	3	3	3
ASPT-226	9	Lutjanus	gibbus	26.5	375	Male	M		3.706
AATT-143	9	Lutjanus	gibbus	43.1	1259	Male	M		1.559
ASPT-233	9	Lutjanus	gibbus	35.1	959	Male			10.887
AATT-159	10	Lutjanus	gibbus	28	415	Female	F	MAT	4.845
ATJL-79	10	Lutjanus	gibbus	38.2	855	Female			3.637
ATJL-78	10	Lutjanus	gibbus	49	1785	Male	M		2.489
ASPT-364	10	Lutjanus	gibbus	27.9	442	Female	F	MAT	10.813
AATT-238	11	Lutjanus	gibbus	26	370	Female	F	MAT	3.86
AATT-270	11	Lutjanus	gibbus	25	335	Male	M		2.893
AATT-269	11	Lutjanus	gibbus	25.8	615	Female	F	MAT	2.149
AATT-271	11	Lutjanus	gibbus	26	340	Male	M		3.926
AATT-276	11	Lutjanus	gibbus	26.1	375	Female	F	MAT	3.038
AATT-275	11	Lutjanus	gibbus	27.3	440	Male	M		1.871
AATT-274	11	Lutjanus	gibbus	27.6	425	Female	F	MAT	6.027
ASPT-543	12	Lutjanus	gibbus	32.7	724	Male			2.718
AATT-407	1	Lutjanus	gibbus	27.8	445	Female	F	MAT	5.442
AATT-402	1	Lutjanus	gibbus	39.7	996	Female	F	IMM	2.572
AATT-406	1	Lutjanus	gibbus	40.5	950	Female	F	IMM	271
AATT-404	1	Lutjanus	gibbus	47.2	1512	Male	M		1.476
AATT-444	1	Lutjanus	gibbus	35.9	1141	Male	M		26.157
AATT-446	1	Lutjanus	gibbus	36.5	1084	Male	M		4.763
AATT-445	1	Lutjanus	gibbus	36.7	935	Male			10.457
AATT-461	1	Lutjanus	gibbus	27.9	421	Female	F	MAT	1.172
AATT-460	1	Lutjanus	gibbus	37.5	1071	Male	M		2.3
ATJL-133	2	Lutjanus	gibbus	38.8	826	Female	M		2.039
ATJL-128	2	Lutjanus	gibbus	40	1010	Male			0.268
ATJL-129	2	Lutjanus	gibbus	42.3	1093	Female	F	IMM	2.643
ATJL-130	2	Lutjanus	gibbus	43	1142	Female	F	IMM	1.856
ATJL-132	2	Lutjanus	gibbus	44	1320	Female	F	IMM	4.184
ATJL-131	2	Lutjanus	gibbus	44.7	1225	Male	M		0.946
AASJ-89	2	Lutjanus	gibbus	37.9	1201	Male	M		0.284
ASPT1587	2	Lutjanus	gibbus	27.6	398	Female			2.205
ASPT 1588	2	Lutjanus	gibbus	29	480	Male			0.531
ASPT-780	3	Lutjanus	gibbus	24	299	Male			2.744
ASPT-779	3	Lutjanus	gibbus	26.3	373	Male			0.672
ASPT-774	3	Lutjanus	gibbus	31.4	646	Male			10.879
ASPT-773	3	Lutjanus	gibbus	34.4	758	Male			15.227
AATT634	5	Lutjanus	gibbus	25.8	345	Male	F	IMM	2.193
AATT632	5	Lutjanus	gibbus	26.2	366	Male	M		4.674
AATT636	5	Lutjanus	gibbus	26.5	423	Male	F	IMM	2.554
AATT629	5	Lutjanus	gibbus	26.8	410	Male			0.294
AATT633	5	Lutjanus	gibbus	26.9	382	Male	F	IMM	10.328
AATT635	5	Lutjanus	gibbus	29.5	485	Male	M		6.217
AATT630	5	Lutjanus	gibbus	32.1	629	Male	M		1.056
AATT631	5	Lutjanus	gibbus	32.8	680	Male	M		0.234
AATT637	5	Lutjanus	gibbus	32.8	687	Male			11.929
AATT638	5	Lutjanus	gibbus	33.8	658	Female	M		1.241
AATT640	5	Lutjanus	gibbus	25.9	403	Male	F	IMM	14.348
AATT641	5	Lutjanus	gibbus	27.4	379	Female	F	IMM	1.807
AATT642	5	Lutjanus	gibbus	27.8	466	Male	M		12.412
AATT639	5	Lutjanus	gibbus	28.7	448	Male			3.88
ASPT-873	5	Lutjanus	gibbus	24.4	294	Male	M		1.836
ASPT-875	5	Lutjanus	gibbus	26.8	375	Male			3.159
ASPT-880	5	Lutjanus	gibbus	26.2	381	Male	F	IMM	3.962
ASPT-943	6	Lutjanus	gibbus	20.9	185	Male			1.451
AATT670	6	Lutjanus	gibbus	32	718	Male			3.496
ASPT-1031	7	Lutjanus	gibbus	30.7	562	Male			6.323
ASPT-1068	8	Lutjanus	gibbus	14.6	61	Male	F	IMM	0.421
ASPT-1069	8	Lutjanus	gibbus	15.7	76	Male	F	IMM	0.45
ASPT1090	8	Lutjanus	gibbus	27.4	433	Male	M		5.03
ASPT1092	8	Lutjanus	gibbus	32.1	682	Male			14.509
ASPT1294	11	Lutjanus	gibbus	36	900	Female			11.53
ASPT1362	11	Lutjanus	gibbus	23.2	270	Male			1.368
ASPT1380	11	Lutjanus	gibbus	26.8	416	Female			2.123
ASPT1378	11	Lutjanus	gibbus	27	394	Female			2.766
ASPT1379	11	Lutjanus	gibbus	28.5	467	Female			4.442		8	7	8	8
ASPT1376	11	Lutjanus	gibbus	29.7	495	Male			2.122
AATT699	12	Lutjanus	gibbus	33	757	Male			11.198
AATT720	12	Lutjanus	gibbus	28.2	417	Female	F	MAT	3.033		8	7	7	7
AATT717	12	Lutjanus	gibbus	32.7	670	Male			6.205
AATT748	12	Lutjanus	gibbus	29.5	525	Female	F	MAT	2
AATT740	12	Lutjanus	gibbus	32.5	690	Male	M		1		7	6	6	6
AATT848	1	Lutjanus	gibbus	27.8	359	Female	F	MAT	3
AATT847	1	Lutjanus	gibbus	37.3	1051	Male			4.84
ASPT1482	1	Lutjanus	gibbus	36.5	964	Male	M		1.099
ASPT1481	1	Lutjanus	gibbus	36.6	939	Male	M		0.794
ASPT1486	1	Lutjanus	gibbus	37.5	1144	Male			3.014
ASPT1509	2	Lutjanus	gibbus	24.7	313	Male	M		0.387
ASPT1503	2	Lutjanus	gibbus	26.4	355	Female	F	MAT	1.794
ASPT1501	2	Lutjanus	gibbus	27.8	394	Female	F	MAT	3.176
ASPT1504	2	Lutjanus	gibbus	33.3	744	Male			1.129
ASPT1516	2	Lutjanus	gibbus	34.4	841	Male	M		3.056
ASPT1499	2	Lutjanus	gibbus	38.3	1092	Male	M		3.258
AATT972	2	Lutjanus	gibbus	27.2	438	Female			4.307
AATT973	2	Lutjanus	gibbus	27.6	395	Female			2.188
AATT971	2	Lutjanus	gibbus	37.5	949	Male			0.949
ASPT 1633	3	Lutjanus	gibbus	33.3	746	Female			3.908
AATT 990	3	Lutjanus	gibbus	40	1307	Male			10.655		9	9		9
ASPT 1666	3	Lutjanus	gibbus	25.2	352	Female			1.964
ASPT 1682	3	Lutjanus	gibbus	28.2	428	Female			1.857
ASPT 1680	3	Lutjanus	gibbus	36	987	Male			4.968
AATT1083	4	Lutjanus	gibbus	34.8	847	Male			7.22		6	6	6	6
ASPT1986	7	Lutjanus	gibbus	27.4	447	Female			8.466
ASPT1991	7	Lutjanus	gibbus	27.4	398	Female			4.284
ASPT1989	7	Lutjanus	gibbus	27.6	389	Female			3.842
ASPT1987	7	Lutjanus	gibbus	33.2	232	Female			0.777
ASPT1984	7	Lutjanus	gibbus	33.8	773	Female			8.745
ASPT1990	7	Lutjanus	gibbus	34.9	881	Female			6.141
ASPT1985	7	Lutjanus	gibbus	36.2	829	Male			1.535
ASPT1988	7	Lutjanus	gibbus	38.2	1102	Male			4.534
ASPT2093	8	Lutjanus	gibbus	25.8	346	Female			3.57
ASPT2095	8	Lutjanus	gibbus	26.6	400	Male			6.44
ASPT2092	8	Lutjanus	gibbus	26.8	385	Female			3.89
ASPT2068	8	Lutjanus	gibbus	27.3	430	Male			3.433
ASPT2087	8	Lutjanus	gibbus	27.6	440	Female			2.18
ASPT2089	8	Lutjanus	gibbus	27.7	404	Female			3.449
ASPT2086	8	Lutjanus	gibbus	27.8	413	Male			0.711
ASPT2090	8	Lutjanus	gibbus	28.2	480	Male			2.507
ASPT2094	8	Lutjanus	gibbus	28.2	421	Female			3.997
ASPT2096	8	Lutjanus	gibbus	29.2	485	Female			4.243
ASPT2074	8	Lutjanus	gibbus	31.3	567	Male			3.23
ASPT2075	8	Lutjanus	gibbus	31.7	697	Male			1.685
ASPT2088	8	Lutjanus	gibbus	32.1	587	Female			5.975
ASPT2091	8	Lutjanus	gibbus	34	843	Male			3.754
ASPT2097	8	Lutjanus	gibbus	35.5	991	Male			16.37
ASPT2067	8	Lutjanus	gibbus	36.2	1157	Male			10.578
ASPT2072	8	Lutjanus	gibbus	36.3	1056	Male			15.718
ASPT2069	8	Lutjanus	gibbus	36.8	1250	Male			5.134
ASPT2073	8	Lutjanus	gibbus	37	1097	Male			15.457
ASPT2077	8	Lutjanus	gibbus	37.5	1072	Male			1.853
ASPT2070	8	Lutjanus	gibbus	38.3	1206	Male			18.304
ASPT2078	8	Lutjanus	gibbus	38.7	1218	Male			2.295
ASPT2076	8	Lutjanus	gibbus	39	1269	Male			24.693
ASPT2071	8	Lutjanus	gibbus	39.4	1318	Male			5.613
ASPT2142	9	Lutjanus	gibbus	34.3	722	Male			2.713
ASPT2143	9	Lutjanus	gibbus	35.4	972	Male			10.497
ASPT2122	9	Lutjanus	gibbus	23.3	259	Female			2.046
ASPT2120	9	Lutjanus	gibbus	26.3	352	Male			0.256
ASPT2121	9	Lutjanus	gibbus	26.4	376	Male			2.116
ASPT2123	9	Lutjanus	gibbus	26.6	406	Male			9.502
ASPT2133	9	Lutjanus	gibbus	27.2	419	Female			7.855
ASPT2135	9	Lutjanus	gibbus	30.2	513	Male			3.923
ASPT2118	9	Lutjanus	gibbus	32.4	733	Female			10.168
ASPT2119	9	Lutjanus	gibbus	32.7	772	Male			12.87
ASPT2134	9	Lutjanus	gibbus	35.5	862	Male			1.366
ASPT2136	9	Lutjanus	gibbus	37.8	998	Male			4.623
ASPT2151	9	Lutjanus	gibbus	23.8	264	Female			0.913
ASPT2152	9	Lutjanus	gibbus	24.5	296	Female			1.79
ASPT2148	9	Lutjanus	gibbus	28.4	468	Female			3.789
ASPT2150	9	Lutjanus	gibbus	33.2	729	Male			0.925
ASPT2149	9	Lutjanus	gibbus	34.2	751	Male			1.585
ASPT2194	9	Lutjanus	gibbus	27.5	417	Female			0.205
ASPT2193	9	Lutjanus	gibbus	28.4	482	Female			0.285
ASPT2191	9	Lutjanus	gibbus	29	452	Female			0.075
ASPT2189	9	Lutjanus	gibbus	31	540	Female			205
ASPT2190	9	Lutjanus	gibbus	36.2	1066	Female			140
ASPT2188	9	Lutjanus	gibbus	36.7	997	Female			0.035
ASPT2192	9	Lutjanus	gibbus	39.3	1279	Male			0.035
ASPT2187	9	Lutjanus	gibbus	48.8	1450	Male			1.265
ASPT2228	10	Lutjanus	gibbus	28.1	438	Female			5.3
ASPT2263	10	Lutjanus	gibbus	30.4	528	Male			3.73
ASPT2230	10	Lutjanus	gibbus	30.7	609	Female			8.4
ASPT2259	10	Lutjanus	gibbus	31.5	682	Male			4.902
ASPT2261	10	Lutjanus	gibbus	31.5	635	Male			5.121
ASPT2244	10	Lutjanus	gibbus	32.2	606	Male			0.2
ASPT2260	10	Lutjanus	gibbus	33.4	684	Male			2.046
ASPT2229	10	Lutjanus	gibbus	36	865	Male			5.2
ASPT2262	10	Lutjanus	gibbus	36.8	831	Male			6.602
ASPT2266	12	Lutjanus	gibbus	32.1	672	Male			1.688
ASPT2268	12	Lutjanus	gibbus	33.8	910	Male			2.066
ASPT2269	12	Lutjanus	gibbus	34.4	881	Male			5.215
AAP-2277	12	Lutjanus	gibbus	35.7	811	Male			1.483
AAP-2275	12	Lutjanus	gibbus	35.8	862	Male			1.888
AAP-2274	12	Lutjanus	gibbus	35.9	945	Male			1.263
AAP-2279	12	Lutjanus	gibbus	36.7	947	Male			1.203
AAP-2278	12	Lutjanus	gibbus	37	871	Male			1.235
AAP-2276	12	Lutjanus	gibbus	38	1118	Male			1.463
ASPT2267	12	Lutjanus	gibbus	38.7	1148	Male			7.132
ATJA-1701	1	Lutjanus	gibbus	21	211	Male			1.142
ATJA-1700	1	Lutjanus	gibbus	23.5	808	Male			7.667
ATE-1742	2	Lutjanus	gibbus	31.4	600	Female			6.459
ATE-1807	6	Lutjanus	gibbus	27.5	451	Female			2.869
ATE-1806	6	Lutjanus	gibbus	28.7	463	Female			3.398
ATE-1804	6	Lutjanus	gibbus	31.5	559	Female			0.246
ATE-1805	6	Lutjanus	gibbus	36.7	988	Male			2.233
ATE-1803	6	Lutjanus	gibbus	38.6	122	Male			6.788
AEA-1837	6	Lutjanus	gibbus	23.2	235	Female			0.896
AEA-1832	6	Lutjanus	gibbus	24.7	312	Male			0.303
AEA-1836	6	Lutjanus	gibbus	26.3	359	Female			1.937
AEA-1841	6	Lutjanus	gibbus	27.2	458	Male			4.773
AEA-1833	6	Lutjanus	gibbus	27.3	423	Female			3.348
AEA-1831	6	Lutjanus	gibbus	28.2	456	Female			4.906
AEA-1834	6	Lutjanus	gibbus	29	466	Female			2.028
AEA-1830	6	Lutjanus	gibbus	29.2	467	Female			2.98
AEA-1829	6	Lutjanus	gibbus	29.3	500	Female			3.622
AEA-1835	6	Lutjanus	gibbus	32.6	719	Female			1.61
AEA-1840	6	Lutjanus	gibbus	37.2	1015	Male			10.086
AEA-1828	6	Lutjanus	gibbus	37.3	1043	Female			2.745
AEA-1838	6	Lutjanus	gibbus	39.1	1395	Male			1.168
AEA-1839	6	Lutjanus	gibbus	40.2	1279	Female			199
ATE-2134	12	Lutjanus	gibbus	20.7	123	Male			0.039
ATE-2135	12	Lutjanus	gibbus	21.7	198	Male			0.127
AATT-2239	1	Lutjanus	gibbus	27.8	447	Female			2.915
AATT-2371	2	Lutjanus	gibbus	25.6	347	Female			1.582
AATT-2376	2	Lutjanus	gibbus	26.4	359	Male			0.718
AATT-2364	2	Lutjanus	gibbus	27	451	Female			2.986
AATT-2374	2	Lutjanus	gibbus	27	421	Female			2.593
AATT-2375	2	Lutjanus	gibbus	27.4	425	Female			2.162
AATT-2377	2	Lutjanus	gibbus	27.4	427	Female			2.289
AATT-2366	2	Lutjanus	gibbus	29	517	Female			4.308
AATT-2372	2	Lutjanus	gibbus	29	506	Male			0.535
AATT-2373	2	Lutjanus	gibbus	29.2	501	Female			0.594
AATT-2365	2	Lutjanus	gibbus	31.4	680	Male			2.803
AATT-2367	2	Lutjanus	gibbus	35.4	979	Male			2.18
AATT-2370	2	Lutjanus	gibbus	36	1152	Male			31.731
AATT-2369	2	Lutjanus	gibbus	40.2	1392	Male			4.121
AATT-2368	2	Lutjanus	gibbus	41	1338	Male			9.215
AATT-2409	3	Lutjanus	gibbus	25.1	311	Male			0.547
AATT-2405	3	Lutjanus	gibbus	26	374	Male			4.249
AATT-2407	3	Lutjanus	gibbus	28.9	479	Male			2.894
AATT-2406	3	Lutjanus	gibbus	29	351	Female			4.156
AATT-2408	3	Lutjanus	gibbus	35.5	901	Male			1.451
AATT-2410	3	Lutjanus	gibbus	36	1071	Male			3.856
AATT-2453	3	Lutjanus	gibbus	29.6	444	Male			0.496
AATT-2454	3	Lutjanus	gibbus	29.6	515	Male			0.546
AATT-2451	3	Lutjanus	gibbus	35.3	1033	Male			30.936
AATT-2459	3	Lutjanus	gibbus	23	237	Female			0.886
AATT-2457	3	Lutjanus	gibbus	26.5	396	Male			2.041
AATT-2462	3	Lutjanus	gibbus	27	400	Female			3.372
AATT-2468	3	Lutjanus	gibbus	27.4	400	Female			4.472
AATT-2461	3	Lutjanus	gibbus	28.6	472	Male			0.831
AATT-2466	3	Lutjanus	gibbus	29	465	Female			4.513
AATT-2460	3	Lutjanus	gibbus	30.6	587	Female			5.73
AATT-2464	3	Lutjanus	gibbus	31	600	Male			1.372
AATT-2465	3	Lutjanus	gibbus	31.6	620	Female			3.582
AATT-2455	3	Lutjanus	gibbus	34.9	9667	Male			5.532
AATT-2456	3	Lutjanus	gibbus	36.2	1142	Male			47.431
AATT-2467	3	Lutjanus	gibbus	36.6	456	Female			2.874
AATT-2458	3	Lutjanus	gibbus	38	1247	Female			8.266
AATT-2463	3	Lutjanus	gibbus	38.9	1252	Female			4.841
ASNTJ-2497	3	Lutjanus	gibbus	21.1	423	Female			1.87
ASNTJ-2506	3	Lutjanus	gibbus	26.4	366	Female			2.097
ASNTJ-2511	3	Lutjanus	gibbus	26.4	357	Male			2.211
ASNTJ-2495	3	Lutjanus	gibbus	26.5	400	Female			1.835
ASNTJ-2508	3	Lutjanus	gibbus	27.3	442	Female			2.709
ASNTJ-2505	3	Lutjanus	gibbus	27.5	518	Female			2.687
ASNTJ-2500	3	Lutjanus	gibbus	27.6	443	Female			2.671
ASNTJ-2504	3	Lutjanus	gibbus	28.8	547	Female			4.038
ASNTJ-2501	3	Lutjanus	gibbus	29.6	594	Female			2.935
ASNTJ-2502	3	Lutjanus	gibbus	31.5	637	Female			2.969
ASNTJ-2509	3	Lutjanus	gibbus	33.8	843	Male			6.391
ASNTJ-2503	3	Lutjanus	gibbus	34.7	905	Male			12.899
ASNTJ-2496	3	Lutjanus	gibbus	36	1101	Male			1.417
ASNTJ-2499	3	Lutjanus	gibbus	36.6	945	Female			4.949
ASNTJ-2498	3	Lutjanus	gibbus	37.8	1137	Female			9.49
ASNTJ-2507	3	Lutjanus	gibbus	38	1057	Male			1.239
ASNTJ-2551	4	Lutjanus	gibbus	37.5	1226	Female			1.568

## Sheet: Lutjanus rufolineatus
Fish_ID	Month	Genus	Species	Length_cm	Weight_g	SexMacro	SexHisto	Maturity	GonWeight_g	Oto_wt_g	Age1_yr	Age2_yr	Age3_yr	ConcensusAge
AASJ 119	3	Lutjanus	rufolineatus	23	22	Female	M		1.051	0.1923	5	5		5
AASJ 120	3	Lutjanus	rufolineatus	17.9	96	Female	F	IMM	0.596	0.1001	2	2		2
AATT 469	2	Lutjanus	rufolineatus	24.5	296	Male			9.708	0.2261	7	6	6	6
AATT 470	2	Lutjanus	rufolineatus	21.7	198	Male			0.812	0.1691	3	3		3
AATT 471	2	Lutjanus	rufolineatus	23	207	Male			1.125	0.1693	4	4		4
AATT 472	2	Lutjanus	rufolineatus	21.9	183	Male			0.113	0.1606	4	3	3	3
AATT 473	2	Lutjanus	rufolineatus	20	152	Female			1.49	0.1937	7	7		7
AATT 474	2	Lutjanus	rufolineatus	21.5	202	Male			0.088	0.1728	4	3	4	4
AATT1206	10	Lutjanus	rufolineatus	19.1	119	Male			1	0.1779	10	9	9	9
AATT1213	9	Lutjanus	rufolineatus	18.5	116	Female			1	0.1251	4	4		4
AATT1214	9	Lutjanus	rufolineatus	23	230	Female			0.001	0.1365	3	3		3
AATT1215	9	Lutjanus	rufolineatus	22.5	224	Male			0.001	0.1546	3	2	3	3
AATT1216	9	Lutjanus	rufolineatus	21.1	181	Male			0.001	0.1254	3	3		3
AATT1217	10	Lutjanus	rufolineatus	23.7	274	Male			3.5	0.1698	4	3	3	3
AATT1218	10	Lutjanus	rufolineatus	21.2	164	Male			0.1	0.1419	4	3	3	3
AATT1219	10	Lutjanus	rufolineatus	22.6	215	Male			0.4	0.2447	8	7	8	8
AATT1220	10	Lutjanus	rufolineatus	21.7	172	Male			0.2	0.1814	5	4	5	5
AATT1221	10	Lutjanus	rufolineatus	22.3	204	Male			0.4	0.2225	6	6		6
AATT1554	11	Lutjanus	rufolineatus	24.6	252	Male			0.3	0.2693	7	7		7
AATT1555	11	Lutjanus	rufolineatus	22.6	209	Female			0.2	0.2029	5	5		5
AATT1556	11	Lutjanus	rufolineatus	19.6	146	Female			4.5	0.1615	3	3		3
AATT1580	11	Lutjanus	rufolineatus	22.2	171	Female			0.2	0.2183	10	8	8	8
AATT1581	11	Lutjanus	rufolineatus	20.6	161	Male			0.4	0.1397	3	3		3
AATT1633	12	Lutjanus	rufolineatus	18	95	Male			0.052	0.1002	2	2		2
AATT-2432	3	Lutjanus	rufolineatus	21.7	188	Male			0.165
AATT-2433	3	Lutjanus	rufolineatus	23.6	240	Male			1.561
AATT-2434	3	Lutjanus	rufolineatus	21.3	186	Male			0.317
AATT-2435	3	Lutjanus	rufolineatus	22.6	197	Male			0.512
AATT-2436	3	Lutjanus	rufolineatus	21.2	184	Male			0.513
AATT-2437	3	Lutjanus	rufolineatus	21.8	203	Male			1.043
AATT-2438	3	Lutjanus	rufolineatus	20.9	154	Female			2.599
AATT-2439	3	Lutjanus	rufolineatus	22.1	192	Male			0.477
AATT-2440	3	Lutjanus	rufolineatus	22	202	Female			0.662
AATT-2441	3	Lutjanus	rufolineatus	19.4	130	Female			1.868
AATT-2442	3	Lutjanus	rufolineatus	17.7	112	Male			1.663
AATT-2443	3	Lutjanus	rufolineatus	21.2	187	Male			0.793
AATT-403	1	Lutjanus	rufolineatus	22.1	210	Male	M		0.017	0.2803	10	8	9	9
AATT-405	1	Lutjanus	rufolineatus	21	180	Male	M		1.064	0.2313	6	6		6
AATT-465	1	Lutjanus	rufolineatus	23.3	265	Female	F	MAT	13.674
AATT-469	1	Lutjanus	rufolineatus	24.5	296	Male	F	MAT	9.708
AATT-470	1	Lutjanus	rufolineatus	21.7	198	Male	M		0.812
AATT-471	1	Lutjanus	rufolineatus	23	207	Male	M		1.125
AATT-472	1	Lutjanus	rufolineatus	21.9	183	Male	M		0.113
AATT-473	1	Lutjanus	rufolineatus	20	152	Female	F	MAT	1.49
AATT-474	1	Lutjanus	rufolineatus	21.5	202	Male	M		0.088
AATT707	12	Lutjanus	rufolineatus	25.5	336	Male	M		0.549	0.2615	8	8		8
AATT708	12	Lutjanus	rufolineatus	23	230	Female	F	MAT	5.024	0.2148	5	4	4	4
AATT709	12	Lutjanus	rufolineatus	23	226	Female	F	MAT	4.739	0.2011	5	7	5	5
AATT755	12	Lutjanus	rufolineatus	23.2	245	Male			0.531	0.1689	4	3	3	3
AATT756	12	Lutjanus	rufolineatus	26.5	334	Male	M		1	0.2445	6	5	5	5
AATT974	2	Lutjanus	rufolineatus	21	201	Male			0.53	0.1581	3	2	3	3
AATT975	2	Lutjanus	rufolineatus	21.8	191	Male			0.508	0.1958	5	5		5
AATT976	2	Lutjanus	rufolineatus	21.2	179	Male			0.943	0.1456	3	2	3	3
AATT977	2	Lutjanus	rufolineatus	23.2	237	Male			0.45	0.1774	4	3	3	3
AATT978	2	Lutjanus	rufolineatus	22.3	218	Male			1.134	0.1584	4	3	3	3
AATT979	2	Lutjanus	rufolineatus	21.8	211	Male			0.242	0.1492	3	3		3
AATT980	2	Lutjanus	rufolineatus	22.3	188	Male			0.48	0.1862	5	5		5
AATT981	2	Lutjanus	rufolineatus	22.7	218	Male	F	MAT	1.036	0.1634	4	4		4
AATT982	2	Lutjanus	rufolineatus	20	159	Male			0.297	0.1238	3	3		3
AATT983	2	Lutjanus	rufolineatus	20.6	170	Male			0.463	0.143	3	3		3
ASNTJ-2513	3	Lutjanus	rufolineatus	20.9	196	Male			0.968
ASNTJ-2514	3	Lutjanus	rufolineatus	20.6	157	Male			1.334
ASPT 1636	3	Lutjanus	rufolineatus	22	184	Female			0.386	0.1555	4	3	3	3
ASPT 1637	3	Lutjanus	rufolineatus	21.6	193	Female			0.339	0.2285	6	6		6
ASPT 1638	3	Lutjanus	rufolineatus	22	183	Female			0.24	0.1596	4	4		4
ASPT 1639	3	Lutjanus	rufolineatus	22.1	209	Male			0.168	0.2044	5	6	5	5
ASPT 1640	3	Lutjanus	rufolineatus	22.1	205	Female			0.319	0.2134	5	5		5
ASPT 1641	3	Lutjanus	rufolineatus	20.9	169	Female			0.702	0.1499	3	4	5	4
ASPT 1642	3	Lutjanus	rufolineatus	19.2	120	Male			0.673	0.142	3	3		3
ASPT 1643	3	Lutjanus	rufolineatus	18.2	111	Male			0.237	0.1049	2	2		2
ASPT 1667	3	Lutjanus	rufolineatus	21.8	204	Male			0.213	0.2024	5	5		5
ASPT 1668	3	Lutjanus	rufolineatus	22.4	207	Male			0.297	0.2119	4	4		4
ASPT 1669	3	Lutjanus	rufolineatus	23	213	Male			0.122	0.2113	5	5		5
ASPT 1670	3	Lutjanus	rufolineatus	21.8	185	Male			0.254	0.1518	3	3		3
ASPT 1684	3	Lutjanus	rufolineatus	21.8	190	Male			0.408	0.1671	4	4		4
ASPT-1020	7	Lutjanus	rufolineatus	22.6	220	Male	M		1.455	0.1846	6	5	4	5
ASPT-1021	7	Lutjanus	rufolineatus	19.6	132	Male	M		1.178	0.1146	2	2		2
ASPT-1022	7	Lutjanus	rufolineatus	19.7	145	Male	M		0.478	0.1161	2	2		2
ASPT-1023	7	Lutjanus	rufolineatus	20.2	145	Male	M		0.556	0.1048	2	2		2
ASPT-1024	7	Lutjanus	rufolineatus	19.3	130	Male	M		0.481	0.1345	4	3	3	3
ASPT-1025	7	Lutjanus	rufolineatus	21.6	189	Male	M		1.981	0.2391	8	7	7	7
ASPT-1026	7	Lutjanus	rufolineatus	20.5	154	Male			1.196	0.1234	3	3		3
ASPT1077	8	Lutjanus	rufolineatus	23.9	273	Male	M		2.515	0.2497	7	7		7
ASPT1078	8	Lutjanus	rufolineatus	21.1	169	Male	M		2.295	0.1511	4	4		4
ASPT1079	8	Lutjanus	rufolineatus	23.5	253	Male			1.199	0.2063	5	5		5
ASPT1080	8	Lutjanus	rufolineatus	21.2	155	Female	F	IMM	1.135	0.2331	6	6		6
ASPT1081	8	Lutjanus	rufolineatus	22.4	217	Male	M		1.228	0.1939	5	5		5
ASPT1082	8	Lutjanus	rufolineatus	22.2	181	Male	M		0.283	0.1687	4	4		4
ASPT1083	8	Lutjanus	rufolineatus	21.3	165	Male	M		0.481	0.148	3	3		3
ASPT1134	8	Lutjanus	rufolineatus	18.6	121	Female	F	MAT	3.319	0.131	3	3		3
ASPT1135	8	Lutjanus	rufolineatus	20.5	155	Female	F	MAT	1.169	0.2374	6	6		6
ASPT1136	8	Lutjanus	rufolineatus	22.2	170	Male	M	MAT	1.178	0.1486	3	3		3
ASPT1137	8	Lutjanus	rufolineatus	23.1	231	Male	M		0.225	0.2464	6	6		6
ASPT1138	8	Lutjanus	rufolineatus	20.3	154	Female	F	IMM	1.194	0.1774	4	4		4
ASPT1336	11	Lutjanus	rufolineatus	22	210	Male			0.272
ASPT1337	11	Lutjanus	rufolineatus	23	216	Male			0.612
ASPT1338	11	Lutjanus	rufolineatus	18.6	110	Male			0.118
ASPT1339	11	Lutjanus	rufolineatus	20.8	156	Female			1.338
ASPT1340	11	Lutjanus	rufolineatus	21.4	187	Male			0.033
ASPT1341	11	Lutjanus	rufolineatus	22.7	214	Female			10.994
ASPT1342	11	Lutjanus	rufolineatus	18.5	125	Male			0.101
ASPT1343	11	Lutjanus	rufolineatus	19.9	150	Female			1.184
ASPT1344	11	Lutjanus	rufolineatus	21.3	163	Female			0.501
ASPT1345	11	Lutjanus	rufolineatus	18.1	119	Female			5.636
ASPT1346	11	Lutjanus	rufolineatus	17.6	103	Female			1.461
ASPT1347	11	Lutjanus	rufolineatus	19.4	144	Female			5.969
ASPT1348	11	Lutjanus	rufolineatus	21.3	192	Male			1.486
ASPT1349	11	Lutjanus	rufolineatus	21.6	184	Male			0.766
ASPT1350	11	Lutjanus	rufolineatus	19.7	138	Female			1.417
ASPT1351	11	Lutjanus	rufolineatus	21.3	181	Female			1.733
ASPT1352	11	Lutjanus	rufolineatus	20.3	147	Male			0.581
ASPT1353	11	Lutjanus	rufolineatus	23.7	288	Male			0.274
ASPT1354	11	Lutjanus	rufolineatus	21.6	185	Male			0.303
ASPT1355	11	Lutjanus	rufolineatus	19.5	152	Female			7.238
ASPT1356	11	Lutjanus	rufolineatus	21.8	199	Male			0.404
ASPT1357	11	Lutjanus	rufolineatus	18.4	127	Female			1.832
ASPT1358	11	Lutjanus	rufolineatus	18	116	Female			4.396
ASPT1381	11	Lutjanus	rufolineatus	21.1	185	Male			0.764
ASPT1382	11	Lutjanus	rufolineatus	22.6	206	Male			0.249
ASPT1383	11	Lutjanus	rufolineatus	24.1	267	Male			1.243
ASPT1384	11	Lutjanus	rufolineatus	21.2	181	Male			0.41
ASPT1385	11	Lutjanus	rufolineatus	22.4	196	Male			0.489
ASPT1386	11	Lutjanus	rufolineatus	21.2	190	Male			0.434
ASPT1387	11	Lutjanus	rufolineatus	18.4	128	Female			3.344
ASPT1388	11	Lutjanus	rufolineatus	20.3	166	Female			2.07
ASPT1992	7	Lutjanus	rufolineatus	21.5	182	Male			0.991
ASPT1993	7	Lutjanus	rufolineatus	25.4	296	Male			0.491
ASPT1994	7	Lutjanus	rufolineatus	17.8	99	Male			0.529
ASPT1995	7	Lutjanus	rufolineatus	19	113	Male			0.179
ASPT2153	9	Lutjanus	rufolineatus	23.2	225	Male			2.125
ASPT2154	9	Lutjanus	rufolineatus	23.2	250	Male			1.248
ASPT2155	9	Lutjanus	rufolineatus	22.3	211	Male			0.22
ASPT2156	9	Lutjanus	rufolineatus	21	176	Male			0.394
ASPT2157	9	Lutjanus	rufolineatus	21.5	195	Male			0.432
ASPT2158	9	Lutjanus	rufolineatus	20.8	182	Male			0.741
ASPT2159	9	Lutjanus	rufolineatus	21.5	192	Male			0.658
ASPT2232	10	Lutjanus	rufolineatus	22.1	189	Male			0.2
ASPT2233	10	Lutjanus	rufolineatus	22.3	184	Male			0.1
ASPT2234	10	Lutjanus	rufolineatus	22.4	195	Male			0.3
ASPT2235	10	Lutjanus	rufolineatus	21.4	176	Male			0.2
ASPT2236	10	Lutjanus	rufolineatus	21.1	161	Male			0.3
ASPT2237	10	Lutjanus	rufolineatus	21.4	171	Male			0.3
ASPT2238	10	Lutjanus	rufolineatus	19.5	126	Female			11.6
ASPT2239	10	Lutjanus	rufolineatus	23.6	225	Male			0.2
ASPT2240	10	Lutjanus	rufolineatus	22.1	185	Male			0.2
ASPT2241	10	Lutjanus	rufolineatus	22.6	195	Male			0.4
ASPT2242	10	Lutjanus	rufolineatus	20.1	135	Male			0.5
ASPT2243	10	Lutjanus	rufolineatus	19.2	125	Male			0.1
ASPT-337	10	Lutjanus	rufolineatus	22.3	195	Male	M		0.099	0.2019	5	5		5
ASPT-338	10	Lutjanus	rufolineatus	23.7	260	Male	M		0.037	0.3581	12	13	12	12
ASPT-339	10	Lutjanus	rufolineatus	23	219	Male	M		0.529	0.1695	4	3	3	3
ASPT-340	10	Lutjanus	rufolineatus	22.6	215	Male	M		0.383	0.1735	5	4	4	4
ASPT-341	10	Lutjanus	rufolineatus	24.6	275	Male	M		0.287	0.2655	7	7		7
ASPT-342	10	Lutjanus	rufolineatus	22.7	199	Male	M		0.325	0.1323	2	2		2
ASPT-343	10	Lutjanus	rufolineatus	23.4	230	Male	M		0.344	0.2703	10	9	9	9
ASPT-344	10	Lutjanus	rufolineatus	21.7	209	Female	F	MAT	5.627	0.1619	4	3	3	3
ASPT-345	10	Lutjanus	rufolineatus	25.7	270	Male	M		0.246	0.3627	11	10	10	10
ASPT-346	10	Lutjanus	rufolineatus	23.6	224	Male	M		0.181	0.2138	5	5		5
ASPT-347	10	Lutjanus	rufolineatus	24.1	229	Male	M		0.374	0.1655	4	4		4
ASPT-348	10	Lutjanus	rufolineatus	22.2	199	Male	M		0.559	0.1579	4	4		4
ASPT-349	10	Lutjanus	rufolineatus	19.8	130	Female	F	MAT	1.645	0.1529	4	4		4
ASPT-350	10	Lutjanus	rufolineatus	19.1	120	Female	F	MAT	2.295	0.1446	3	3		3
ASPT-380	10	Lutjanus	rufolineatus	20.1	147	Male	M		0.279
ASPT-381	10	Lutjanus	rufolineatus	22.9	191	Male	M		0.233	0.146	4	4		4
ASPT-450	11	Lutjanus	rufolineatus	23.9	240	Male	M		0.33		5	5		5
ASPT-451	11	Lutjanus	rufolineatus	24.1	255	Male	M		0.357
ASPT-452	11	Lutjanus	rufolineatus	22.8	215	Male	M		0.36
ASPT-468	11	Lutjanus	rufolineatus	26.6	350	Male	M		0.364	0.2367	6	5	5	5
ASPT-469	11	Lutjanus	rufolineatus	23.3	227	Female	F	MAT	7.8	0.1926	5	5		5
ASPT-470	11	Lutjanus	rufolineatus	22.1	181	Male	M		0.228	0.1831	3	4	3	3
ASPT-475	11	Lutjanus	rufolineatus	22.1	211	Male	M		0.173	0.1757	4	4		4
ASPT-476	11	Lutjanus	rufolineatus	21.1	187	Male	M		0.213	0.2672	8	8		8
ASPT-477	11	Lutjanus	rufolineatus	21.6	182	Male	M		0.22	0.2064	6	6		6
ASPT-614	1	Lutjanus	rufolineatus	21.7	192	Male	M		1.32	0.2338	8	7	7	7
ASPT-615	1	Lutjanus	rufolineatus	20.2	132	Female	F	MAT	1.486	0.1861	5	5		5
ASPT-616	1	Lutjanus	rufolineatus	21.8	183	Male	M		0.127	0.1728	4	4		4
ASPT-617	1	Lutjanus	rufolineatus	20.7	159	Male	M		0.262	0.135	3	3		3
ASPT-618	1	Lutjanus	rufolineatus	22.7	208	Male	M		1.73	0.1634	3	3		3
ASPT-619	1	Lutjanus	rufolineatus	20.9	165	Male	M		0.327	0.1265	2	2		2
ASPT-680	1	Lutjanus	rufolineatus	21.5	172	Male	M		0.217	0.2334	6	6		6
ASPT-681	1	Lutjanus	rufolineatus	21.2	184	Male			0.306	0.197	6	6		6
ASPT-683	1	Lutjanus	rufolineatus	20.7	125	Male	M		0.35	0.1993	5	6	6	6
ASPT-684	1	Lutjanus	rufolineatus	15.8	149	Male	M		0.121	0.1346	2	2		2
ASPT-685	1	Lutjanus	rufolineatus	16.5	137	Male	M		0.208	0.1305	2	2		2
ASPT-690	1	Lutjanus	rufolineatus	17	103	Female	F	MAT	0.03	0.1558	4	4		4
ASPT-701	1	Lutjanus	rufolineatus	22	200	Male	M		0.558	0.1649	3	3		3
ASPT-741	3	Lutjanus	rufolineatus	23.7	242	Male	M		0.136	0.2197	6	6		6
ASPT-743	3	Lutjanus	rufolineatus	20.6	82	Male	M		0.189	0.1689	5	4	4	4
ASPT-745	3	Lutjanus	rufolineatus	20.5	151	Female	F	MAT	2.251	0.1729	6	6		6
ASPT-747	3	Lutjanus	rufolineatus	24.7	323	Male	M		0.326	0.2425	7	7		7
ASPT-749	3	Lutjanus	rufolineatus	23.5	250	Male	M		0.536	0.2125	5	4	4	4
ASPT-751	3	Lutjanus	rufolineatus	21.7	198	Male	M		0.108	0.1466	4	4		4
ASPT-753	3	Lutjanus	rufolineatus	26.6	354	Male	M		0.559	0.272	5	5		5
ASPT-754	3	Lutjanus	rufolineatus	23.6	230	Male	M		0.132	0.2229	5	5		5
ASPT-755	3	Lutjanus	rufolineatus	24.3	268	Male	M		0.418	0.189	4	4		4
ASPT-756	3	Lutjanus	rufolineatus	21.8	195	Male	M		0.189	0.1788	4	4		4
ASPT-758	3	Lutjanus	rufolineatus	27	404	Male	M		0.524	0.2923	6	7	7	7
ASPT-760	3	Lutjanus	rufolineatus	23.5	255	Male	M		0.271	0.2148	5	6	6	6
ASPT-762	3	Lutjanus	rufolineatus	22.7	220	Male	M		0.152	0.1625	4	3	3	3
ASPT-764	3	Lutjanus	rufolineatus	22	199	Male	M		0.227	0.1951	5	5		5
ASPT-766	3	Lutjanus	rufolineatus	23.8	238	Male	M		0.225	0.233	7	7		7
ASPT-770	3	Lutjanus	rufolineatus	23.3	255	Female	F	MAT	4.157	0.1882	6	5	4	5
ASPT-772	3	Lutjanus	rufolineatus	23.9	267	Male	M		0.271	0.1962	5	5		5
ASPT-958	6	Lutjanus	rufolineatus	22	189	Male	M		0.411
ASPT-959	6	Lutjanus	rufolineatus	21.8	180	Male	M		0.27
ASPT-960	6	Lutjanus	rufolineatus	23.4	258	Male	M		0.686
ASPT-961	6	Lutjanus	rufolineatus	22.3	188	Male	M		0.347
ASPT-962	6	Lutjanus	rufolineatus	22.2	200	Male	M		0.134
ATJL-122	2	Lutjanus	rufolineatus	23.2	237	Male	M		0.438	0.2246	7	6	7	7
ATJL-123	2	Lutjanus	rufolineatus	22	206	Male	F	MAT	0.184	0.1941	4	4		4
ATJL-124	2	Lutjanus	rufolineatus	20.9	155	Male	M		0.087	0.166	3	3		3
ATJL-125	2	Lutjanus	rufolineatus	20.5	144	Male	M		0.461	0.1191	2	2		2
ATJL-126	2	Lutjanus	rufolineatus	23.5	226	Female			0.352	0.219	5	5		5
ATJL-127	2	Lutjanus	rufolineatus	23	213	Male	M		0.624	0.1845	5	5		5
ATJL-87	10	Lutjanus	rufolineatus	22	182	Male	M		0.4	0.1745	4	4		4
ATJL-88	10	Lutjanus	rufolineatus	19.8	161	Male	M		0.2	0.1361	4	3	4	4
ATJL-89	10	Lutjanus	rufolineatus	21	180	Male	M		0.3	0.1165	4	4		4

## Sheet: Fishery length distributions
L_xanthochilus	L_gibbus	L_rufolineatus
19.5	14.6	15.8
19.7	15.7	15.9
20.3	17	16.1
19.8	17	16.3
20.7	17.2	16.5
20.7	17.4	16.5
21.1	17.5	17
21.1	17.6	17
21.1	18.4	17
21.2	18.4	17.1
21.5	18.5	17.2
21.6	18.5	17.3
22	18.6	17.4
22.3	18.7	17.5
22.3	19.1	17.5
22.5	19.2	17.6
22.5	19.2	17.6
22.5	19.4	17.8
23.2	19.5	17.9
23.4	19.5	17.9
23.5	19.7	17.9
23.8	19.7	17.9
23.9	19.7	18
24	19.8	18
24.2	19.8	18
24.2	19.8	18.1
24.3	19.8	18.1
24.5	20	18.2
24.5	20.1	18.2
24.5	20.2	18.2
24.6	20.4	18.2
24.7	20.4	18.2
24.7	20.4	18.2
25	20.5	18.2
25	20.5	18.2
25.1	20.5	18.3
25.2	20.5	18.3
25.3	20.5	18.3
25.3	20.7	18.3
25.4	20.7	18.3
25.5	20.7	18.3
25.5	20.8	18.4
25.5	20.9	18.4
25.8	20.9	18.4
25.8	20.9	18.4
25.9	21	18.4
26	21	18.4
26	21	18.4
26.1	21	18.4
26.2	21	18.5
26.3	21	18.5
26.3	21	18.5
26.4	21.1	18.5
26.5	21.1	18.6
26.5	21.2	18.6
26.5	21.2	18.6
26.6	21.2	18.6
26.6	21.2	18.6
26.6	21.3	18.6
26.7	21.4	18.6
26.8	21.4	18.7
27	21.4	18.8
27	21.4	18.9
27	21.5	18.9
27	21.7	18.9
27.1	21.7	18.9
27.2	21.7	18.9
27.2	21.7	19
27.2	21.7	19
27.3	21.7	19
27.4	21.8	19
27.4	21.8	19
27.4	21.9	19
27.5	22	19
27.5	22	19
27.5	22	19.1
27.5	22.1	19.1
27.5	22.1	19.1
30	23.8	19.1
27.5	22.2	19.2
27.6	22.2	19.2
27.7	22.2	19.2
27.7	22.2	19.2
28	22.2	19.2
28	22.2	19.2
28	22.3	19.2
28	22.4	19.2
28	22.4	19.2
28.1	22.4	19.2
28.2	22.4	19.2
28.4	22.4	19.2
30.1	23.8	19.2
28.4	22.5	19.3
28.5	22.5	19.3
28.5	22.6	19.3
28.5	22.6	19.3
28.6	22.7	19.3
28.6	22.7	19.3
28.6	22.8	19.3
30.1	23.8	19.3
28.6	22.9	19.4
28.6	23	19.4
28.6	23	19.4
28.7	23	19.4
30.2	23.8	19.4
28.7	23	19.5
28.9	23	19.5
29	23	19.5
29.1	23	19.5
29.1	23	19.5
29.1	23	19.5
29.1	23	19.5
29.2	23	19.5
29.2	23.1	19.5
29.3	23.1	19.5
29.3	23.2	19.5
29.3	23.2	19.5
29.4	23.2	19.5
29.4	23.2	19.5
29.4	23.2	19.5
29.4	23.3	19.5
29.4	23.3	19.5
30.2	23.8	19.5
30.3	23.8	19.5
29.4	23.3	19.6
29.4	23.4	19.6
29.5	23.5	19.6
29.5	23.5	19.6
29.5	23.5	19.6
29.5	23.5	19.6
29.5	23.5	19.6
30.2	23.8	19.6
29.6	23.5	19.7
29.7	23.5	19.7
29.7	23.5	19.7
29.7	23.6	19.7
30.2	23.8	19.7
29.8	23.6	19.8
29.8	23.6	19.8
29.9	23.6	19.8
30	23.6	19.8
30	23.6	19.8
30	23.6	19.8
30	23.7	19.8
30.3	23.8	19.8
30	23.7	19.9
30	23.7	19.9
30	23.7	19.9
30.3	23.8	19.9
30.4	23.8	20
30.4	23.9	20
30.4	23.9	20
30.5	23.9	20
30.5	23.9	20
30.5	24	20
30.5	24	20
30.5	24	20
30.6	24	20
30.6	24	20
30.6	24	20
30.6	24	20
30.6	24	20
30.6	24	20
30.6	24.1	20
30.7	24.1	20
30.7	24.1	20
30.7	24.2	20
30.7	24.2	20
32	25.4	20
30.7	24.2	20.1
30.8	24.2	20.1
30.8	24.2	20.1
30.8	24.2	20.1
30.8	24.3	20.1
30.8	24.3	20.1
32	25.4	20.1
30.9	24.3	20.2
30.9	24.3	20.2
30.9	24.3	20.2
30.9	24.3	20.2
31	24.3	20.2
31	24.3	20.2
31	24.4	20.2
31	24.4	20.2
31	24.4	20.2
31	24.4	20.2
31.1	24.4	20.2
31.1	24.5	20.2
32	25.4	20.2
31.1	24.5	20.3
31.2	24.5	20.3
31.2	24.5	20.3
31.2	24.6	20.3
31.2	24.6	20.3
31.2	24.6	20.3
31.2	24.6	20.3
31.2	24.6	20.3
31.2	24.6	20.3
31.3	24.6	20.3
32	25.4	20.3
31.3	24.6	20.4
31.3	24.6	20.4
31.3	24.6	20.4
31.3	24.6	20.4
31.4	24.7	20.4
31.4	24.7	20.4
31.4	24.7	20.4
31.4	24.7	20.4
32	25.4	20.4
31.4	24.7	20.5
31.4	24.7	20.5
31.4	24.7	20.5
31.4	24.7	20.5
31.4	24.7	20.5
31.5	24.8	20.5
31.5	24.8	20.5
31.5	24.8	20.5
31.5	24.8	20.5
31.5	24.8	20.5
31.5	24.8	20.5
31.5	24.8	20.5
31.5	24.8	20.5
31.5	24.9	20.5
31.5	24.9	20.5
31.5	24.9	20.5
31.6	24.9	20.5
31.6	25	20.5
31.6	25	20.5
31.6	25	20.5
31.6	25	20.5
31.6	25	20.5
31.6	25	20.5
31.6	25	20.5
32	25.5	20.5
32.1	25.5	20.5
31.6	25	20.6
31.6	25	20.6
31.6	25	20.6
31.6	25	20.6
31.6	25	20.6
31.6	25	20.6
31.6	25.1	20.6
32	25.5	20.6
32.1	25.5	20.6
31.6	25.1	20.7
31.7	25.1	20.7
31.7	25.1	20.7
31.7	25.2	20.7
31.7	25.2	20.7
31.7	25.2	20.7
31.7	25.2	20.7
31.7	25.2	20.7
31.7	25.2	20.7
32	25.5	20.7
31.7	25.2	20.8
31.7	25.2	20.8
31.7	25.2	20.8
31.7	25.2	20.8
31.7	25.3	20.8
31.8	25.3	20.8
31.8	25.3	20.8
31.8	25.3	20.8
32	25.5	20.8
31.8	25.3	20.9
31.8	25.3	20.9
31.8	25.3	20.9
31.8	25.3	20.9
31.9	25.3	20.9
31.9	25.4	20.9
31.9	25.4	20.9
32	25.4	20.9
32	25.4	20.9
32	25.4	20.9
32.1	25.5	20.9
32.1	25.5	21
32.1	25.5	21
32.1	25.5	21
32.1	25.5	21
32.2	25.5	21
32.2	25.5	21
32.2	25.6	21
32.2	25.6	21
32.2	25.6	21
32.2	25.6	21
32.2	25.6	21
32.2	25.6	21
32.2	25.6	21
32.2	25.6	21
32.2	25.6	21
32.2	25.6	21
32.3	25.6	21
32.3	25.7	21
32.3	25.7	21
32.3	25.7	21
32.3	25.7	21
32.3	25.7	21
32.4	25.7	21
32.4	25.7	21
32.4	25.7	21
32.4	25.7	21
32.4	25.7	21
32.4	25.7	21
32.4	25.7	21
32.4	25.7	21
32.4	25.7	21
33.4	26.5	21
32.4	25.7	21.1
32.4	25.7	21.1
32.4	25.7	21.1
32.4	25.7	21.1
32.5	25.7	21.1
32.5	25.7	21.1
32.5	25.8	21.1
32.5	25.8	21.1
32.5	25.8	21.1
32.5	25.8	21.1
32.5	25.8	21.1
32.5	25.8	21.1
32.5	25.8	21.1
32.5	25.8	21.1
32.5	25.8	21.1
32.5	25.8	21.1
32.5	25.8	21.1
32.5	25.8	21.1
32.5	25.9	21.1
33.4	26.5	21.1
32.5	25.9	21.2
32.5	25.9	21.2
32.5	25.9	21.2
32.5	25.9	21.2
32.5	25.9	21.2
32.5	25.9	21.2
32.5	25.9	21.2
32.5	26	21.2
32.5	26	21.2
32.6	26	21.2
32.6	26	21.2
32.6	26	21.2
32.6	26	21.2
32.6	26	21.2
32.6	26	21.2
32.6	26	21.2
32.6	26	21.2
33.4	26.5	21.2
32.6	26	21.3
32.6	26	21.3
32.6	26	21.3
32.6	26	21.3
32.6	26	21.3
32.6	26	21.3
32.6	26	21.3
32.6	26	21.3
32.6	26	21.3
32.6	26	21.3
32.7	26	21.3
32.7	26	21.3
32.7	26	21.3
32.7	26	21.3
32.7	26	21.3
32.7	26	21.3
32.7	26	21.3
33.4	26.5	21.3
32.7	26	21.4
32.7	26	21.4
32.7	26	21.4
32.7	26	21.4
32.7	26	21.4
32.7	26	21.4
32.7	26	21.4
32.7	26.1	21.4
32.8	26.1	21.4
32.8	26.1	21.4
32.8	26.1	21.4
32.8	26.1	21.4
32.8	26.1	21.4
32.8	26.1	21.4
32.8	26.1	21.4
33.4	26.6	21.4
32.8	26.1	21.5
32.8	26.1	21.5
32.8	26.1	21.5
32.8	26.1	21.5
32.8	26.2	21.5
32.8	26.2	21.5
32.8	26.2	21.5
32.8	26.2	21.5
32.8	26.2	21.5
32.9	26.2	21.5
32.9	26.2	21.5
32.9	26.2	21.5
33	26.2	21.5
33	26.2	21.5
33	26.2	21.5
33	26.2	21.5
33	26.2	21.5
33	26.2	21.5
33	26.2	21.5
33	26.2	21.5
33	26.2	21.5
33	26.2	21.5
33	26.2	21.5
33	26.2	21.5
33	26.2	21.5
33	26.2	21.5
33.4	26.6	21.5
33	26.2	21.6
33	26.2	21.6
33	26.2	21.6
33	26.3	21.6
33	26.3	21.6
33	26.3	21.6
33	26.3	21.6
33	26.3	21.6
33	26.3	21.6
33	26.3	21.6
33	26.3	21.6
33	26.3	21.6
33	26.3	21.6
33	26.3	21.6
33.1	26.3	21.6
33.1	26.3	21.6
33.1	26.3	21.6
33.1	26.3	21.6
33.1	26.3	21.6
33.2	26.3	21.6
33.4	26.6	21.6
33.2	26.4	21.7
33.2	26.4	21.7
33.2	26.4	21.7
33.2	26.4	21.7
33.2	26.4	21.7
33.2	26.4	21.7
33.2	26.4	21.7
33.2	26.4	21.7
33.2	26.4	21.7
33.2	26.4	21.7
33.2	26.4	21.7
33.2	26.4	21.7
33.2	26.4	21.7
33.2	26.4	21.7
33.2	26.4	21.7
33.2	26.4	21.7
33.2	26.4	21.7
33.2	26.4	21.7
33.2	26.4	21.7
33.2	26.4	21.7
33.3	26.4	21.7
33.3	26.4	21.7
33.3	26.4	21.7
33.5	26.6	21.7
33.3	26.4	21.8
33.3	26.5	21.8
33.3	26.5	21.8
33.3	26.5	21.8
33.3	26.5	21.8
33.3	26.5	21.8
33.3	26.5	21.8
33.3	26.5	21.8
33.3	26.5	21.8
33.3	26.5	21.8
33.3	26.5	21.8
33.3	26.5	21.8
33.3	26.5	21.8
33.3	26.5	21.8
33.3	26.5	21.8
33.3	26.5	21.8
33.3	26.5	21.8
33.3	26.5	21.8
33.4	26.5	21.8
33.5	26.6	21.8
33.4	26.5	21.9
33.4	26.5	21.9
33.4	26.5	21.9
33.4	26.5	21.9
33.4	26.5	21.9
33.4	26.5	21.9
33.4	26.5	21.9
33.4	26.5	21.9
33.4	26.5	21.9
33.4	26.5	21.9
33.4	26.5	21.9
33.4	26.5	21.9
33.4	26.5	21.9
33.5	26.6	21.9
33.5	26.6	22
33.5	26.6	22
33.5	26.6	22
33.5	26.6	22
33.5	26.6	22
33.5	26.6	22
33.5	26.6	22
33.5	26.6	22
33.5	26.6	22
33.5	26.6	22
33.5	26.6	22
33.5	26.6	22
33.5	26.6	22
33.5	26.6	22
33.5	26.7	22
33.5	26.7	22
33.5	26.7	22
33.5	26.7	22
33.5	26.7	22
33.5	26.7	22
33.5	26.7	22
33.5	26.7	22
33.5	26.7	22
33.5	26.7	22
33.5	26.7	22
33.5	26.7	22
33.5	26.7	22
33.5	26.7	22
33.6	26.7	22
33.6	26.7	22
33.6	26.7	22
33.6	26.7	22
33.6	26.7	22
33.6	26.8	22
33.6	26.8	22
33.6	26.8	22
33.6	26.8	22
33.6	26.8	22
33.7	26.8	22
33.7	26.8	22
33.7	26.8	22
33.7	26.8	22.1
33.7	26.8	22.1
33.7	26.8	22.1
33.7	26.8	22.1
33.7	26.8	22.1
33.7	26.8	22.1
33.7	26.8	22.1
33.7	26.8	22.1
33.7	26.8	22.1
33.7	26.8	22.1
33.7	26.8	22.1
33.7	26.8	22.1
33.8	26.9	22.1
33.8	26.9	22.1
33.8	26.9	22.1
33.8	26.9	22.1
33.8	26.9	22.1
33.8	26.9	22.1
33.8	26.9	22.1
33.8	26.9	22.1
33.8	26.9	22.1
33.8	26.9	22.1
33.8	26.9	22.1
33.8	26.9	22.2
33.8	26.9	22.2
33.8	27	22.2
33.8	27	22.2
33.8	27	22.2
33.9	27	22.2
33.9	27	22.2
33.9	27	22.2
33.9	27	22.2
33.9	27	22.2
34	27	22.2
34	27	22.2
34	27	22.2
34	27	22.2
34	27	22.2
34	27	22.2
34	27	22.2
34	27	22.2
34	27	22.2
34	27	22.2
34	27	22.2
34	27	22.2
34	27	22.2
34	27	22.3
34	27	22.3
34	27	22.3
34	27	22.3
34	27	22.3
34	27	22.3
34	27	22.3
34	27	22.3
34	27	22.3
34	27	22.3
34	27	22.3
34	27	22.3
34	27	22.3
34	27	22.3
34	27	22.3
34	27	22.3
34	27	22.4
34	27	22.4
34	27	22.4
34.1	27	22.4
34.1	27	22.4
34.1	27	22.4
34.1	27	22.4
34.1	27	22.4
34.1	27	22.4
34.1	27	22.4
34.1	27	22.4
34.1	27	22.4
34.1	27	22.4
34.2	27.1	22.4
34.2	27.1	22.4
34.2	27.1	22.4
34.2	27.1	22.4
34.2	27.1	22.5
34.2	27.1	22.5
34.2	27.1	22.5
34.2	27.2	22.5
34.2	27.2	22.5
34.2	27.2	22.5
34.2	27.2	22.5
34.2	27.2	22.5
34.2	27.2	22.5
34.2	27.2	22.5
34.2	27.2	22.5
34.2	27.2	22.5
34.2	27.2	22.5
34.2	27.2	22.5
34.2	27.2	22.5
34.3	27.2	22.5
34.3	27.2	22.5
34.3	27.2	22.5
34.3	27.2	22.5
34.3	27.2	22.5
34.3	27.2	22.5
34.3	27.2	22.5
34.3	27.2	22.5
34.3	27.2	22.5
34.3	27.2	22.5
34.3	27.2	22.5
34.3	27.2	22.6
34.3	27.2	22.6
34.3	27.2	22.6
34.3	27.2	22.6
34.3	27.2	22.6
34.3	27.2	22.6
34.3	27.2	22.6
34.3	27.2	22.6
34.3	27.2	22.6
34.3	27.2	22.6
34.3	27.2	22.6
34.3	27.2	22.6
34.4	27.2	22.6
34.4	27.2	22.6
34.4	27.2	22.6
34.4	27.2	22.6
34.4	27.2	22.6
34.4	27.2	22.6
34.4	27.2	22.6
34.4	27.2	22.6
34.4	27.2	22.7
34.4	27.2	22.7
34.4	27.2	22.7
34.4	27.2	22.7
34.4	27.2	22.7
34.4	27.3	22.7
34.4	27.3	22.7
34.4	27.3	22.7
34.4	27.3	22.7
34.4	27.3	22.7
34.4	27.3	22.7
34.4	27.3	22.7
34.4	27.3	22.7
34.4	27.3	22.8
34.5	27.3	22.8
34.5	27.3	22.8
34.5	27.3	22.8
34.5	27.3	22.8
34.5	27.3	22.8
34.5	27.3	22.8
34.5	27.3	22.9
34.5	27.3	22.9
34.5	27.3	22.9
34.5	27.3	22.9
34.5	27.3	22.9
34.5	27.3	23
34.5	27.3	23
34.5	27.3	23
34.5	27.3	23
34.5	27.3	23
34.5	27.3	23
34.5	27.3	23
34.5	27.3	23
34.5	27.3	23
34.5	27.3	23
34.6	27.3	23
34.6	27.3	23
34.6	27.4	23
34.6	27.4	23
34.6	27.4	23
34.6	27.4	23
34.6	27.4	23
34.6	27.4	23
34.6	27.4	23
34.6	27.4	23
34.6	27.4	23
34.6	27.4	23
34.6	27.4	23
34.6	27.4	23
34.6	27.4	23
34.6	27.4	23
34.6	27.4	23
34.6	27.4	23.1
34.6	27.4	23.1
34.6	27.4	23.1
34.6	27.4	23.1
34.6	27.4	23.1
34.7	27.4	23.2
34.7	27.4	23.2
34.7	27.4	23.2
34.7	27.4	23.2
34.7	27.4	23.2
34.7	27.4	23.2
34.7	27.4	23.2
34.7	27.4	23.2
34.7	27.4	23.2
34.7	27.4	23.2
34.7	27.4	23.2
34.7	27.4	23.2
34.7	27.4	23.2
34.7	27.4	23.2
34.7	27.4	23.3
34.7	27.4	23.3
34.7	27.4	23.3
34.7	27.4	23.4
34.7	27.4	23.4
34.7	27.4	23.4
34.7	27.4	23.4
34.7	27.4	23.4
34.7	27.4	23.4
34.7	27.5	23.4
34.7	27.5	23.4
34.8	27.5	23.4
34.8	27.5	23.4
34.8	27.5	23.5
34.8	27.5	23.5
34.8	27.5	23.5
34.8	27.5	23.5
34.8	27.5	23.5
34.8	27.5	23.5
34.8	27.5	23.5
34.8	27.5	23.5
34.8	27.5	23.5
34.8	27.5	23.5
34.8	27.5	23.5
34.8	27.5	23.5
34.8	27.5	23.5
34.8	27.5	23.5
34.8	27.5	23.5
34.8	27.5	23.5
34.8	27.5	23.5
34.8	27.5	23.5
34.8	27.5	23.5
34.8	27.5	23.6
34.9	27.5	23.6
34.9	27.5	23.6
34.9	27.5	23.6
34.9	27.5	23.6
34.9	27.5	23.6
34.9	27.5	23.6
34.9	27.5	23.6
34.9	27.5	23.6
34.9	27.5	23.7
34.9	27.5	23.7
35	27.5	23.7
35	27.5	23.7
35	27.5	23.7
35	27.5	23.7
35	27.5	23.7
35	27.5	23.8
35	27.5	23.8
35	27.5	23.8
35	27.5	23.9
35	27.5	23.9
35	27.5	23.9
35	27.5	23.9
35	27.5	24
35	27.5	24
35	27.6	24
35	27.6	24
35	27.6	24
35	27.6	24
35	27.6	24
35	27.6	24
35	27.6	24
35.1	27.6	24
35.1	27.6	24.1
35.1	27.6	24.1
35.1	27.6	24.1
35.1	27.6	24.1
35.1	27.6	24.1
35.1	27.6	24.2
35.1	27.6	24.2
35.1	27.6	24.2
35.2	27.6	24.2
35.2	27.6	24.3
35.2	27.6	24.3
35.2	27.6	24.3
35.2	27.6	24.3
35.2	27.6	24.3
35.2	27.6	24.4
35.2	27.6	24.4
35.2	27.6	24.5
35.2	27.6	24.5
35.2	27.6	24.5
35.2	27.6	24.5
35.2	27.6	24.5
35.2	27.6	24.5
35.2	27.6	24.6
35.2	27.6	24.6
35.2	27.6	24.6
35.2	27.6	24.7
35.2	27.6	25
35.2	27.6	25
35.2	27.6	25
35.2	27.6	25
35.2	27.6	25.2
35.3	27.6	25.2
35.3	27.6	25.2
35.3	27.6	25.3
35.3	27.6	25.3
35.3	27.7	25.4
35.3	27.7	25.5
35.3	27.7	25.5
35.3	27.7	25.5
35.3	27.7	25.5
35.3	27.7	25.5
35.3	27.7	25.7
35.3	27.7	25.9
35.3	27.7	25.9
35.3	27.7	26
35.3	27.7	26
35.4	27.7	26.1
35.4	27.7	26.3
35.4	27.7	26.3
35.4	27.7	26.4
35.4	27.7	26.4
35.4	27.7	26.5
35.4	27.7	26.5
35.4	27.7	26.5
35.4	27.7	26.6
35.4	27.7	26.6
35.4	27.7	27
35.4	27.7	27.1
35.4	27.7	27.3
35.4	27.7	27.5
35.4	27.7	27.8
35.4	27.7
35.4	27.7
35.4	27.7
35.5	27.8
35.5	27.8
35.5	27.8
35.5	27.8
35.5	27.8
35.5	27.8
35.5	27.8
35.5	27.8
35.5	27.8
35.5	27.8
35.5	27.8
35.5	27.8
35.5	27.8
35.5	27.8
35.5	27.8
35.5	27.8
35.5	27.8
35.5	27.8
35.5	27.8
35.5	27.8
35.5	27.8
35.5	27.8
35.5	27.8
35.5	27.8
35.5	27.8
35.5	27.8
35.5	27.8
35.5	27.8
35.5	27.8
35.5	27.8
35.5	27.8
35.5	27.8
35.5	27.8
35.6	27.8
35.6	27.8
35.6	27.8
35.6	27.8
35.6	27.8
35.6	27.8
35.6	27.8
35.6	27.8
35.6	27.8
35.6	27.8
35.6	27.9
35.6	27.9
35.6	27.9
35.6	27.9
35.6	27.9
35.6	27.9
35.6	27.9
35.7	27.9
35.7	27.9
35.7	27.9
35.7	27.9
35.7	27.9
35.7	27.9
35.7	27.9
35.7	27.9
35.7	27.9
35.7	27.9
35.7	27.9
35.7	27.9
35.7	27.9
35.7	27.9
35.7	27.9
35.7	27.9
35.7	27.9
35.7	27.9
35.7	28
35.7	28
35.7	28
35.7	28
35.8	28
35.8	28
35.8	28
35.8	28
35.8	28
35.8	28
35.8	28
35.8	28
35.8	28
35.8	28
35.8	28
35.8	28
35.8	28
35.8	28
35.8	28
35.8	28
35.8	28
35.8	28
35.8	28
35.8	28
35.9	28
35.9	28
35.9	28
35.9	28
35.9	28
35.9	28
35.9	28
35.9	28
35.9	28
35.9	28
36	28
36	28
36	28
36	28
36	28
36	28
36	28
36	28
36	28
36	28
36	28
36	28
36	28
36	28
36	28
36	28
36	28.1
36	28.1
36	28.1
36	28.1
36	28.1
36	28.1
36	28.1
36	28.1
36	28.1
36	28.1
36	28.1
36	28.1
36	28.1
36	28.1
36	28.1
36	28.1
36	28.1
36	28.2
36	28.2
36	28.2
36	28.2
36.1	28.2
36.1	28.2
36.1	28.2
36.1	28.2
36.1	28.2
36.1	28.2
36.1	28.2
36.1	28.2
36.2	28.2
36.2	28.2
36.2	28.2
36.2	28.2
36.2	28.2
36.2	28.2
36.2	28.2
36.2	28.2
36.2	28.2
36.2	28.2
36.2	28.2
36.2	28.2
36.2	28.2
36.2	28.2
36.2	28.2
36.2	28.2
36.2	28.2
36.2	28.2
36.2	28.2
36.2	28.2
36.2	28.2
36.2	28.2
36.2	28.2
36.2	28.2
36.3	28.2
36.3	28.2
36.3	28.2
36.3	28.2
36.3	28.2
36.3	28.2
36.3	28.2
36.3	28.2
36.3	28.2
36.3	28.2
36.3	28.2
36.4	28.2
36.4	28.2
36.4	28.2
36.4	28.2
36.4	28.2
36.4	28.2
36.4	28.2
36.4	28.2
36.4	28.3
36.4	28.3
36.4	28.3
36.4	28.3
36.4	28.3
36.4	28.3
36.4	28.3
36.4	28.3
36.4	28.3
36.4	28.3
36.4	28.3
36.4	28.3
36.4	28.3
36.4	28.3
36.4	28.3
36.4	28.3
36.4	28.3
36.4	28.3
36.4	28.3
36.4	28.3
36.4	28.3
36.4	28.3
36.4	28.3
36.4	28.3
36.4	28.3
36.4	28.4
36.4	28.4
36.5	28.4
36.5	28.4
36.5	28.4
36.5	28.4
36.5	28.4
36.5	28.4
36.5	28.4
36.5	28.4
36.5	28.4
36.5	28.4
36.5	28.4
36.5	28.4
36.5	28.4
36.5	28.4
36.5	28.4
36.5	28.4
36.5	28.4
36.5	28.4
36.5	28.4
36.5	28.4
36.5	28.4
36.5	28.4
36.5	28.4
36.5	28.4
36.5	28.4
36.5	28.4
36.5	28.4
36.5	28.4
36.5	28.4
36.5	28.4
36.5	28.4
36.5	28.4
36.5	28.5
36.5	28.5
36.5	28.5
36.5	28.5
36.5	28.5
36.5	28.5
36.5	28.5
36.5	28.5
36.5	28.5
36.5	28.5
36.5	28.5
36.5	28.5
36.6	28.5
36.6	28.5
36.6	28.5
36.6	28.5
36.6	28.5
36.6	28.5
36.6	28.5
36.6	28.5
36.6	28.5
36.6	28.5
36.6	28.5
36.6	28.5
36.6	28.5
36.6	28.5
36.6	28.5
36.6	28.5
36.6	28.5
36.6	28.5
36.6	28.5
36.6	28.5
36.7	28.5
36.7	28.5
36.7	28.5
36.7	28.5
36.7	28.5
36.7	28.5
36.7	28.5
36.7	28.5
36.7	28.5
36.7	28.5
36.7	28.6
36.7	28.6
36.7	28.6
36.7	28.6
36.7	28.6
36.7	28.6
36.7	28.6
36.7	28.6
36.7	28.6
36.7	28.6
36.7	28.6
36.7	28.6
36.8	28.6
36.8	28.6
36.8	28.6
36.8	28.6
36.8	28.6
36.8	28.6
36.8	28.6
36.8	28.6
36.8	28.6
36.8	28.6
36.8	28.7
36.8	28.7
36.8	28.7
36.8	28.7
36.8	28.7
36.8	28.7
36.8	28.7
36.8	28.7
36.8	28.7
36.8	28.7
36.8	28.7
36.8	28.7
36.8	28.7
36.8	28.7
36.8	28.7
36.8	28.7
36.9	28.7
36.9	28.7
36.9	28.7
36.9	28.7
36.9	28.7
36.9	28.7
36.9	28.7
36.9	28.7
36.9	28.7
36.9	28.7
36.9	28.7
37	28.7
37	28.7
37	28.8
37	28.8
37	28.8
37	28.8
37	28.8
37	28.8
37	28.8
37	28.8
37	28.8
37	28.8
37	28.8
37	28.8
37	28.8
37	28.8
37	28.8
37	28.8
37	28.8
37	28.8
37	28.8
37	28.8
37	28.8
37	28.9
37	28.9
37	28.9
37	28.9
37	28.9
37	28.9
37	28.9
37	28.9
37	28.9
37	29
37	29
37	29
37	29
37	29
37	29
37	29
37	29
37	29
37	29
37	29
37	29
37	29
37	29
37	29
37.1	29
37.1	29
37.1	29
37.1	29
37.1	29
37.1	29
37.1	29
37.1	29
37.1	29
37.1	29
37.1	29
37.1	29
37.1	29
37.1	29
37.2	29
37.2	29
37.2	29
37.2	29
37.2	29
37.2	29
37.2	29
37.2	29
37.2	29
37.2	29
37.2	29
37.2	29
37.2	29
37.2	29
37.2	29
37.2	29
37.2	29
37.2	29
37.2	29
37.2	29
37.2	29
37.2	29
37.2	29.1
37.2	29.1
37.2	29.1
37.2	29.1
37.2	29.1
37.2	29.1
37.2	29.1
37.2	29.1
37.2	29.2
37.2	29.2
37.2	29.2
37.2	29.2
37.2	29.2
37.2	29.2
37.2	29.2
37.2	29.2
37.2	29.2
37.2	29.2
37.2	29.2
37.2	29.2
37.2	29.2
37.2	29.2
37.2	29.2
37.2	29.2
37.2	29.2
37.2	29.2
37.2	29.2
37.3	29.2
37.3	29.2
37.3	29.2
37.3	29.2
37.3	29.2
37.3	29.2
37.3	29.2
37.3	29.2
37.3	29.2
37.3	29.2
37.3	29.2
37.3	29.2
37.3	29.2
37.3	29.2
37.3	29.2
37.4	29.2
37.4	29.2
37.4	29.2
37.4	29.2
37.4	29.3
37.4	29.3
37.4	29.3
37.4	29.3
37.4	29.3
37.4	29.3
37.4	29.3
37.4	29.3
37.4	29.3
37.4	29.3
37.4	29.3
37.4	29.3
37.4	29.3
37.4	29.3
37.4	29.3
37.4	29.3
37.5	29.3
37.5	29.3
37.5	29.3
37.5	29.3
37.5	29.3
37.5	29.4
37.5	29.4
37.5	29.4
37.5	29.4
37.5	29.4
37.5	29.4
37.5	29.4
37.5	29.4
37.5	29.4
37.5	29.4
37.5	29.4
37.5	29.4
37.5	29.4
37.5	29.4
37.5	29.4
37.5	29.4
37.5	29.4
37.5	29.4
37.5	29.4
37.5	29.4
37.5	29.4
37.5	29.4
37.5	29.4
37.5	29.4
37.5	29.4
37.5	29.5
37.5	29.5
37.5	29.5
37.5	29.5
37.5	29.5
37.5	29.5
37.5	29.5
37.5	29.5
37.5	29.5
37.5	29.5
37.5	29.5
37.5	29.5
37.5	29.5
37.5	29.5
37.5	29.5
37.5	29.5
37.6	29.5
37.6	29.5
37.6	29.5
37.6	29.5
37.6	29.5
37.6	29.5
37.6	29.5
37.6	29.5
37.6	29.5
37.6	29.5
37.6	29.5
37.6	29.5
37.6	29.5
37.6	29.5
37.6	29.5
37.6	29.5
37.6	29.5
37.6	29.5
37.6	29.6
37.6	29.6
37.6	29.6
37.6	29.6
37.6	29.6
37.6	29.6
37.6	29.6
37.6	29.6
37.6	29.6
37.7	29.6
37.7	29.6
37.7	29.6
37.7	29.6
37.7	29.6
37.7	29.6
37.7	29.6
37.7	29.6
37.7	29.6
37.7	29.6
37.7	29.6
37.7	29.6
37.7	29.6
37.7	29.6
37.7	29.6
37.7	29.6
37.7	29.6
37.7	29.6
37.7	29.6
37.8	29.6
37.8	29.6
37.8	29.7
37.8	29.7
37.8	29.7
37.8	29.7
37.8	29.7
37.8	29.7
37.8	29.7
37.8	29.7
37.8	29.7
37.8	29.7
37.8	29.7
37.8	29.7
37.8	29.7
37.8	29.7
37.8	29.7
37.8	29.8
37.8	29.8
37.8	29.8
37.8	29.8
37.8	29.8
37.9	29.8
37.9	29.8
37.9	29.8
37.9	29.8
37.9	29.8
37.9	29.8
37.9	29.8
37.9	29.8
37.9	29.8
37.9	29.8
37.9	29.8
37.9	29.8
37.9	29.8
37.9	29.8
37.9	29.8
37.9	29.9
37.9	29.9
38	29.9
38	29.9
38	29.9
38	29.9
38	29.9
38	29.9
38	30
38	30
38	30
38	30
38	30
38	30
38	30
38	30
38	30
38	30
38	30
38	30
38	30
38	30
38	30
38	30
38	30
38	30
38	30
38	30
38	30
38	30
38	30
38	30
38	30
38	30
38	30
38	30
38	30
38	30
38	30
38	30
38	30
38	30
38	30
38	30
38	30.1
38	30.1
38	30.1
38	30.1
38	30.1
38	30.1
38	30.1
38	30.1
38	30.2
38	30.2
38	30.2
38	30.2
38	30.2
38	30.2
38	30.2
38	30.2
38	30.2
38	30.2
38	30.2
38	30.2
38.1	30.2
38.1	30.2
38.1	30.2
38.1	30.2
38.1	30.2
38.1	30.2
38.1	30.2
38.1	30.2
38.1	30.2
38.1	30.2
38.1	30.2
38.1	30.3
38.2	30.3
38.2	30.3
38.2	30.3
38.2	30.3
38.2	30.3
38.2	30.3
38.2	30.3
38.2	30.3
38.2	30.3
38.2	30.3
38.2	30.3
38.2	30.3
38.2	30.3
38.2	30.4
38.2	30.4
38.2	30.4
38.2	30.4
38.2	30.4
38.2	30.4
38.2	30.4
38.2	30.4
38.2	30.4
38.2	30.4
38.2	30.4
38.2	30.4
38.2	30.4
38.2	30.4
38.2	30.4
38.2	30.4
38.2	30.4
38.2	30.4
38.2	30.4
38.2	30.4
38.2	30.4
38.3	30.5
38.3	30.5
38.3	30.5
38.3	30.5
38.3	30.5
38.3	30.5
38.3	30.5
38.3	30.5
38.3	30.5
38.3	30.5
38.3	30.5
38.3	30.5
38.3	30.5
38.3	30.5
38.3	30.5
38.3	30.5
38.3	30.5
38.3	30.5
38.3	30.5
38.4	30.5
38.4	30.5
38.4	30.5
38.4	30.5
38.4	30.5
38.4	30.5
38.4	30.5
38.4	30.5
38.4	30.5
38.4	30.5
38.4	30.6
38.4	30.6
38.4	30.6
38.4	30.6
38.4	30.6
38.4	30.6
38.4	30.6
38.4	30.6
38.4	30.6
38.4	30.6
38.4	30.6
38.4	30.6
38.4	30.6
38.4	30.6
38.4	30.7
38.4	30.7
38.5	30.7
38.5	30.7
38.5	30.7
38.5	30.7
38.5	30.7
38.5	30.7
38.5	30.7
38.5	30.7
38.5	30.7
38.5	30.7
38.5	30.7
38.5	30.7
38.5	30.7
38.5	30.7
38.5	30.8
38.5	30.8
38.5	30.8
38.5	30.8
38.5	30.8
38.5	30.8
38.5	30.8
38.5	30.8
38.5	30.8
38.5	30.8
38.5	30.8
38.5	30.8
38.5	30.8
38.5	30.8
38.5	30.8
38.5	30.8
38.5	30.9
38.5	30.9
38.5	30.9
38.5	30.9
38.5	30.9
38.5	30.9
38.5	30.9
38.5	30.9
38.5	30.9
38.5	31
38.5	31
38.5	31
38.5	31
38.5	31
38.5	31
38.5	31
38.5	31
38.5	31
38.5	31
38.6	31
38.6	31
38.6	31
38.6	31
38.6	31
38.6	31
38.6	31
38.6	31
38.6	31
38.6	31
38.6	31
38.6	31
38.6	31
38.6	31
38.6	31
38.6	31.1
38.6	31.1
38.6	31.1
38.7	31.2
38.7	31.2
38.7	31.2
38.7	31.2
38.7	31.2
38.7	31.2
38.7	31.2
38.7	31.2
38.7	31.2
38.7	31.2
38.7	31.2
38.7	31.3
38.7	31.3
38.7	31.3
38.7	31.3
38.7	31.3
38.7	31.3
38.7	31.3
38.7	31.3
38.7	31.3
38.7	31.4
38.7	31.4
38.7	31.4
38.7	31.4
38.7	31.4
38.7	31.4
38.7	31.4
38.7	31.4
38.7	31.4
38.7	31.4
38.7	31.4
38.7	31.4
38.7	31.4
38.7	31.4
38.7	31.4
38.7	31.4
38.8	31.4
38.8	31.4
38.8	31.4
38.8	31.4
38.8	31.4
38.8	31.4
38.8	31.4
38.8	31.4
38.8	31.4
38.8	31.4
38.8	31.5
38.8	31.5
38.8	31.5
38.8	31.5
38.8	31.5
38.8	31.5
38.8	31.5
38.8	31.5
38.8	31.5
38.8	31.5
38.8	31.5
38.8	31.5
38.8	31.5
38.8	31.5
38.8	31.5
38.8	31.5
38.8	31.5
38.8	31.5
38.8	31.5
38.8	31.5
38.8	31.5
38.8	31.5
38.8	31.5
38.9	31.5
38.9	31.5
38.9	31.5
38.9	31.5
38.9	31.5
38.9	31.5
38.9	31.5
38.9	31.6
38.9	31.6
38.9	31.6
38.9	31.6
38.9	31.6
39	31.6
39	31.6
39	31.6
39	31.6
39	31.6
39	31.6
39	31.7
39	31.7
39	31.7
39	31.7
39	31.7
39	31.7
39	31.7
39	31.7
39	31.7
39	31.7
39	31.8
39	31.8
39	31.8
39	31.8
39	31.8
39	31.8
39	31.8
39	31.8
39	31.8
39	31.8
39	31.8
39	31.8
39	31.8
39	31.9
39	32
39	32
39	32
39	32
39	32
39	32
39	32
39	32
39	32
39	32
39	32
39	32
39	32
39	32
39	32
39	32
39	32
39	32
39	32
39	32
39	32
39	32
39	32
39	32.1
39	32.1
39	32.1
39	32.1
39	32.1
39	32.1
39	32.1
39	32.1
39	32.1
39	32.1
39	32.2
39	32.2
39	32.2
39	32.2
39	32.2
39	32.2
39	32.2
39.1	32.2
39.1	32.2
39.1	32.2
39.1	32.2
39.1	32.3
39.1	32.3
39.1	32.3
39.1	32.3
39.1	32.3
39.1	32.3
39.1	32.3
39.1	32.3
39.1	32.3
39.1	32.3
39.1	32.3
39.1	32.3
39.2	32.3
39.2	32.4
39.2	32.4
39.2	32.4
39.2	32.4
39.2	32.4
39.2	32.4
39.2	32.4
39.2	32.4
39.2	32.4
39.2	32.4
39.2	32.4
39.2	32.5
39.2	32.5
39.2	32.5
39.2	32.5
39.2	32.5
39.2	32.5
39.2	32.5
39.2	32.5
39.2	32.5
39.2	32.5
39.2	32.5
39.2	32.5
39.3	32.5
39.3	32.5
39.3	32.5
39.3	32.5
39.3	32.5
39.3	32.5
39.3	32.5
39.3	32.5
39.3	32.5
39.3	32.5
39.3	32.5
39.3	32.5
39.3	32.5
39.3	32.5
39.3	32.6
39.3	32.6
39.4	32.6
39.4	32.6
39.4	32.6
39.4	32.6
39.4	32.6
39.4	32.6
39.4	32.6
39.4	32.7
39.4	32.7
39.4	32.7
39.4	32.7
39.4	32.7
39.4	32.7
39.4	32.7
39.4	32.7
39.4	32.8
39.4	32.8
39.4	32.8
39.4	32.8
39.4	32.8
39.4	32.8
39.5	32.8
39.5	32.8
39.5	32.8
39.5	32.9
39.5	32.9
39.5	32.9
39.5	32.9
39.5	32.9
39.5	33
39.5	33
39.5	33
39.5	33
39.5	33
39.5	33
39.5	33
39.5	33
39.5	33
39.5	33
39.5	33
39.5	33
39.5	33
39.5	33
39.5	33
39.5	33
39.5	33
39.5	33
39.5	33
39.5	33
39.5	33
39.5	33.1
39.5	33.1
39.5	33.1
39.5	33.1
39.5	33.2
39.5	33.2
39.5	33.2
39.5	33.2
39.5	33.2
39.5	33.2
39.5	33.2
39.5	33.2
39.5	33.2
39.5	33.2
39.5	33.2
39.5	33.2
39.5	33.2
39.5	33.2
39.5	33.2
39.5	33.2
39.5	33.2
39.5	33.3
39.5	33.3
39.5	33.3
39.5	33.3
39.5	33.3
39.5	33.3
39.5	33.3
39.5	33.3
39.5	33.3
39.5	33.3
39.6	33.3
39.6	33.4
39.6	33.4
39.6	33.4
39.6	33.4
39.6	33.4
39.6	33.4
39.6	33.4
39.6	33.4
39.6	33.4
39.6	33.4
39.6	33.5
39.6	33.5
39.6	33.5
39.6	33.5
39.6	33.5
39.6	33.5
39.6	33.5
39.6	33.5
39.6	33.5
39.6	33.5
39.6	33.5
39.6	33.5
39.6	33.5
39.6	33.5
[truncated: 789 more rows]
